# Supplementary material
Source: HighWire-hosted journal article supplement (https://gut.bmj.com/content/gutjnl-2020-322753)
Supplement: inline-supplementary-material-2 [file inline-supplementary-material-2.xlsx]

## Sheet: Table S1
	Table S1: Taxon statistics comparing continuous abundance data of SHIP-2 and SHIP-3 samples
	Given are taxon statistics for 1,282 SHIP-2 and paired 1,282 SHIP-3 samples. All taxa at genus level that were present in at least ten percent of all SHIP-2 samples and with a mean abundance of at least 0.1% were analyzed. The order of the taxa corresponds to their mean relative abundance at SHIP-2 (from top to bottom). Statistical significance was assessed by the Wilcoxon signed-rank test. Resul…
		SHIP-2 (%)	SHIP-3 (%)	Relative difference (%)	SHIP-2 (%)	SHIP-3 (%)	Statistic	p value	q value
		mean (sem)	mean (sem)	(SHIP-3/SHIP-2 -1) x 100	median (1st - 3rd quartile)	median (1st - 3rd quartile)
	Bacteroides	18.887 ± 0.307	19.716 ± 0.283	4.392	18.200 (10.575-25.748)	19.135 (12.175-26.190)	371050	0.00329732	0.014728
	Prevotella	7.437 ± 0.313	6.693 ± 0.294	-9.997	0.130 (0.000-12.598)	0.085 (0.000-11.338)	215471	0.0526447	0.113781
	Faecalibacterium	7.087 ± 0.134	7.872 ± 0.144	11.068	6.260 (3.592-9.627)	7.135 (4.243-10.915)	342618	1.35076e-06	1.50834e-05
	Lachnospiraceae (f)	6.996 ± 0.109	6.484 ± 0.100	-7.315	6.395 (4.135-9.147)	6.110 (3.800-8.547)	465385	4.37641e-05	0.0003258
	Ruminococcaceae (f)	6.675 ± 0.113	6.661 ± 0.111	-0.205	6.225 (3.880-9.020)	6.315 (3.690-9.120)	409513	0.975484	0.975484
	Alistipes	4.555 ± 0.119	4.479 ± 0.108	-1.661	3.520 (1.360-6.527)	3.675 (1.465-6.445)	406662	0.957537	0.972045
	Oscillibacter	3.269 ± 0.072	3.216 ± 0.077	-1.645	2.595 (1.453-4.447)	2.460 (1.242-4.390)	416941	0.408641	0.526519
	Clostridiales (o)	3.191 ± 0.123	3.401 ± 0.129	6.558	1.490 (0.360-4.380)	1.630 (0.320-4.798)	382590	0.346378	0.483486
	Parasutterella	3.002 ± 0.108	3.011 ± 0.106	0.324	1.460 (0.220-4.468)	1.450 (0.260-4.408)	374406	0.607932	0.714587
	Parabacteroides	2.582 ± 0.062	2.584 ± 0.065	0.093	2.040 (0.990-3.578)	2.095 (1.042-3.508)	397760	0.235522	0.394499
	Ruminococcus	2.440 ± 0.080	2.694 ± 0.089	10.425	1.535 (0.550-3.167)	1.650 (0.612-3.678)	350082	0.0154082	0.0517133
	Sutterella	2.052 ± 0.093	1.524 ± 0.069	-25.734	0.120 (0.000-3.085)	0.105 (0.000-2.147)	230937	3.02156e-07	5.06111e-06
	Roseburia	1.804 ± 0.049	1.900 ± 0.051	5.31	1.255 (0.570-2.510)	1.350 (0.600-2.600)	389778	0.181679	0.312115
	Firmicutes (p)	1.366 ± 0.054	1.480 ± 0.058	8.348	0.740 (0.250-1.570)	0.775 (0.290-1.795)	367420	0.0238059	0.0675562
	Bacteroidales (o)	1.222 ± 0.068	1.187 ± 0.064	-2.852	0.010 (0.000-1.418)	0.000 (0.000-1.450)	155682	0.932863	0.961566
	Subdoligranulum	1.192 ± 0.039	1.358 ± 0.044	13.948	0.790 (0.280-1.670)	0.850 (0.340-1.768)	349158	0.000771455	0.00430729
	Barnesiella	1.155 ± 0.049	1.221 ± 0.049	5.637	0.395 (0.000-1.557)	0.510 (0.040-1.720)	301306	0.0635514	0.125234
	Clostridium IV	1.098 ± 0.055	1.023 ± 0.049	-6.794	0.360 (0.143-1.137)	0.400 (0.160-1.060)	395300	0.844041	0.927062
	Clostridium XlVa	1.074 ± 0.050	1.202 ± 0.050	11.95	0.470 (0.200-1.020)	0.560 (0.230-1.335)	351372	3.1034e-05	0.00025991
	Porphyromonadaceae (f)	0.936 ± 0.058	0.867 ± 0.056	-7.335	0.000 (0.000-0.790)	0.000 (0.000-0.630)	100716	0.391921	0.526519
	Holdemanella	0.841 ± 0.049	0.670 ± 0.040	-20.355	0.040 (0.000-0.890)	0.000 (0.000-0.698)	170282	0.00109267	0.00563146
	Ruminococcus2	0.840 ± 0.024	0.799 ± 0.024	-4.927	0.600 (0.272-1.130)	0.555 (0.240-1.060)	432202	0.0189657	0.0580415
	Alphaproteobacteria (c)	0.787 ± 0.055	0.751 ± 0.055	-4.546	0.000 (0.000-0.458)	0.000 (0.000-0.418)	143547	0.26665	0.406035
	Collinsella	0.786 ± 0.043	0.796 ± 0.040	1.375	0.250 (0.050-0.830)	0.270 (0.060-0.867)	344162	0.419308	0.530069
	Proteobacteria (p)	0.778 ± 0.050	0.685 ± 0.044	-11.907	0.000 (0.000-0.720)	0.020 (0.000-0.605)	196781	0.266638	0.406035
	Coprococcus	0.756 ± 0.027	0.760 ± 0.027	0.421	0.380 (0.100-1.060)	0.400 (0.120-1.040)	373366	0.751446	0.853337
	Bacteroidetes (p)	0.725 ± 0.062	0.570 ± 0.048	-21.358	0.000 (0.000-0.100)	0.000 (0.000-0.070)	81232.5	0.0154368	0.0517133
	Escherichia.Shigella	0.700 ± 0.054	0.859 ± 0.063	22.679	0.040 (0.000-0.380)	0.070 (0.000-0.560)	216662	0.000726257	0.00430729
	Blautia	0.675 ± 0.031	0.710 ± 0.033	5.198	0.270 (0.100-0.730)	0.330 (0.110-0.798)	362418	0.0405302	0.100224
	Fusicatenibacter	0.610 ± 0.024	0.548 ± 0.022	-10.178	0.300 (0.100-0.760)	0.280 (0.090-0.688)	416250	0.0190584	0.0580415
	Phascolarctobacterium	0.604 ± 0.037	0.677 ± 0.038	12.219	0.000 (0.000-0.398)	0.000 (0.000-0.720)	108807	0.0546123	0.114345
	Bacteria (k)	0.585 ± 0.044	0.593 ± 0.046	1.279	0.025 (0.000-0.390)	0.010 (0.000-0.410)	199956	0.915517	0.961566
	Odoribacter	0.580 ± 0.023	0.568 ± 0.021	-2.059	0.420 (0.150-0.768)	0.415 (0.180-0.760)	385202	0.402666	0.526519
	Butyrivibrio	0.554 ± 0.050	0.377 ± 0.041	-32.012	0.000 (0.000-0.000)	0.000 (0.000-0.000)	32190.5	1.87583e-05	0.000179543
	Prevotellaceae (f)	0.471 ± 0.056	0.420 ± 0.044	-10.77	0.000 (0.000-0.000)	0.000 (0.000-0.000)	32796	0.877126	0.947862
	Paraprevotella	0.453 ± 0.032	0.392 ± 0.025	-13.567	0.000 (0.000-0.350)	0.000 (0.000-0.270)	68150.5	0.289382	0.430858
	Clostridia (c)	0.446 ± 0.031	0.566 ± 0.038	27.104	0.000 (0.000-0.320)	0.000 (0.000-0.410)	132164	0.00423155	0.0166773
	Alloprevotella	0.432 ± 0.038	0.377 ± 0.038	-12.547	0.000 (0.000-0.000)	0.000 (0.000-0.000)	37246	0.0564352	0.114581
	Anaerotruncus	0.431 ± 0.021	0.448 ± 0.023	3.958	0.160 (0.050-0.448)	0.140 (0.030-0.430)	357772	0.266572	0.406035
	Bilophila	0.427 ± 0.018	0.414 ± 0.016	-2.97	0.160 (0.010-0.558)	0.210 (0.030-0.610)	306800	0.0460143	0.102765
	Butyricimonas	0.405 ± 0.016	0.362 ± 0.014	-10.659	0.190 (0.000-0.590)	0.200 (0.000-0.520)	281510	0.0435224	0.100552
	Flavonifractor	0.378 ± 0.015	0.341 ± 0.011	-9.683	0.230 (0.100-0.430)	0.230 (0.110-0.410)	409722	0.0418847	0.100224
	Clostridium XlVb	0.350 ± 0.015	0.294 ± 0.014	-15.835	0.170 (0.060-0.420)	0.130 (0.032-0.348)	425402	4.98659e-07	6.68203e-06
	Streptococcus	0.343 ± 0.026	0.399 ± 0.025	16.189	0.060 (0.000-0.230)	0.090 (0.020-0.350)	275029	2.76723e-07	5.06111e-06
	Erysipelotrichaceae (f)	0.334 ± 0.017	0.339 ± 0.019	1.558	0.140 (0.040-0.360)	0.130 (0.030-0.380)	372845	0.931967	0.961566
	Enterobacteriaceae (f)	0.312 ± 0.039	0.422 ± 0.053	35.38	0.000 (0.000-0.060)	0.000 (0.000-0.110)	93921	0.00199852	0.00956434
	Akkermansia	0.296 ± 0.027	0.447 ± 0.034	51.015	0.010 (0.000-0.160)	0.040 (0.000-0.370)	171011	8.91682e-11	5.97427e-09
	Butyricicoccus	0.291 ± 0.011	0.270 ± 0.010	-7.437	0.170 (0.070-0.350)	0.160 (0.080-0.320)	398992	0.406241	0.526519
	Mitsuokella	0.287 ± 0.037	0.337 ± 0.040	17.328	0.000 (0.000-0.000)	0.000 (0.000-0.000)	16309.5	0.177413	0.312115
	Catenibacterium	0.274 ± 0.025	0.216 ± 0.020	-21.094	0.000 (0.000-0.048)	0.000 (0.000-0.008)	49255	0.0958524	0.183489
	Coprobacter	0.254 ± 0.013	0.274 ± 0.014	7.782	0.070 (0.000-0.320)	0.090 (0.000-0.358)	236945	0.327615	0.467025
	Clostridium sensu stricto	0.250 ± 0.023	0.238 ± 0.025	-4.917	0.010 (0.000-0.160)	0.000 (0.000-0.140)	198973	0.141869	0.256897
	Pseudoflavonifractor	0.248 ± 0.010	0.260 ± 0.009	5.122	0.120 (0.040-0.300)	0.150 (0.060-0.330)	328302	0.00883948	0.0329025
	Haemophilus	0.244 ± 0.024	0.195 ± 0.017	-20.269	0.000 (0.000-0.110)	0.000 (0.000-0.100)	158526	0.501263	0.621937
	Catabacter	0.243 ± 0.013	0.199 ± 0.010	-18.402	0.100 (0.010-0.280)	0.070 (0.000-0.250)	340713	0.000395884	0.00265242
	Dorea	0.224 ± 0.011	0.233 ± 0.010	3.906	0.110 (0.000-0.280)	0.110 (0.000-0.290)	317662	0.259891	0.406035
	Burkholderiales (o)	0.219 ± 0.021	0.198 ± 0.020	-9.188	0.000 (0.000-0.020)	0.000 (0.000-0.000)	47415	0.119105	0.221668
	Desulfovibrio	0.219 ± 0.020	0.197 ± 0.015	-10.235	0.000 (0.000-0.000)	0.000 (0.000-0.000)	43371	0.801517	0.895027
	Megasphaera	0.213 ± 0.029	0.162 ± 0.022	-24.226	0.000 (0.000-0.000)	0.000 (0.000-0.000)	11984	0.304115	0.44295
	Rikenellaceae (f)	0.211 ± 0.027	0.156 ± 0.020	-26.243	0.000 (0.000-0.000)	0.000 (0.000-0.000)	13247	0.0285911	0.0766241
	Eggerthella	0.172 ± 0.009	0.114 ± 0.006	-33.65	0.050 (0.000-0.190)	0.040 (0.000-0.130)	305376	1.07098e-09	3.58779e-08
	Eisenbergiella	0.166 ± 0.018	0.146 ± 0.014	-12.252	0.000 (0.000-0.100)	0.000 (0.000-0.090)	164462	0.555484	0.676681
	Acidaminococcus	0.136 ± 0.018	0.210 ± 0.029	53.9	0.000 (0.000-0.000)	0.000 (0.000-0.000)	13431.5	0.0304245	0.0784016
	Citrobacter	0.119 ± 0.016	0.166 ± 0.020	38.797	0.000 (0.000-0.000)	0.000 (0.000-0.000)	52101	0.00356503	0.0149285
	Desulfovibrionaceae (f)	0.119 ± 0.010	0.108 ± 0.009	-9.705	0.000 (0.000-0.000)	0.000 (0.000-0.000)	47938.5	0.591119	0.707232
	Coriobacteriaceae (f)	0.118 ± 0.007	0.102 ± 0.006	-13.582	0.030 (0.000-0.130)	0.030 (0.000-0.120)	271903	0.0241992	0.0675562
	Clostridium XVIII	0.100 ± 0.008	0.105 ± 0.008	4.387	0.010 (0.000-0.090)	0.000 (0.000-0.080)	194856	0.665747	0.769053

## Sheet: Table S2
	Table S2: Taxon statistics comparing binary presence-absence data of SHIP-2 and SHIP-3 samples
	Given are taxon statistics for 1,282 SHIP-2 and paired 1,282 SHIP-3 samples. All taxa at genus level that were present in at least ten percent but less than eighty percent of all SHIP-2 samples were analyzed. The order of the taxa corresponds to their amount of non-zero samples at SHIP-2 (from top to bottom). Statistical significance was assessed using McNemar's test. Resulting p values were adju…
		Non-zero samples (%)		Odds ratio	p value	q value
		SHIP-2	SHIP-3	(95%-confidence interval)
	Catabacter	76.521	72.075	0.709 (0.566-0.886)	0.00216918	0.0166304
	Bilophila	75.819	79.251	1.297 (1.042-1.619)	0.0195668	0.0675055
	Barnesiella	73.011	77.145	1.351 (1.089-1.679)	0.00570638	0.0287061
	Dorea	72.933	72.309	0.967 (0.804-1.163)	0.747339	0.805725
	Streptococcus	72.465	78.393	1.469 (1.198-1.805)	0.000169685	0.00195138
	Butyricimonas	67.785	69.267	1.130 (0.899-1.422)	0.307398	0.451287
	Eggerthella	64.665	59.984	0.754 (0.619-0.917)	0.00429204	0.0246792
	Coriobacteriaceae (f)	63.729	62.48	0.931 (0.770-1.125)	0.478562	0.602828
	Intestinimonas	63.573	56.084	0.684 (0.571-0.819)	2.55425e-05	0.000440608
	Coprobacter	62.871	63.963	1.079 (0.875-1.332)	0.498033	0.613648
	Anaerovorax	59.75	60.062	1.015 (0.855-1.204)	0.898043	0.938863
	Prevotella	58.658	57.176	0.885 (0.703-1.112)	0.307398	0.451287
	Holdemania	58.346	59.906	1.084 (0.905-1.299)	0.392656	0.521024
	Escherichia.Shigella	55.772	59.516	1.203 (1.009-1.435)	0.0395711	0.113199
	Sutterella	55.616	53.978	0.886 (0.714-1.100)	0.284344	0.445903
	Bacteria (k)	54.758	52.418	0.865 (0.709-1.054)	0.153993	0.280025
	Akkermansia	52.262	59.438	1.472 (1.223-1.775)	3.22901e-05	0.000445603
	Clostridium XVIII	51.794	48.674	0.850 (0.708-1.018)	0.078598	0.174944
	Clostridium sensu stricto	51.56	48.596	0.850 (0.705-1.023)	0.0870973	0.187803
	Holdemanella	51.248	47.582	0.715 (0.560-0.911)	0.0061499	0.0287061
	Bacteroidales (o)	50.234	49.688	0.955 (0.757-1.204)	0.73039	0.799951
	Proteobacteria (p)	49.142	52.262	1.200 (0.991-1.455)	0.0628687	0.150924
	Clostridia (c)	47.66	45.086	0.835 (0.676-1.031)	0.0947086	0.192203
	Haemophilus	44.774	43.526	0.932 (0.771-1.125)	0.480515	0.602828
	Eisenbergiella	43.838	41.264	0.881 (0.739-1.050)	0.16167	0.286032
	Anaerostipes	42.434	34.633	0.673 (0.561-0.806)	1.14229e-05	0.000296877
	Ethanoligenens	40.796	40.016	0.957 (0.792-1.155)	0.672786	0.773704
	Olsenella	40.484	40.484	1.000 (0.811-1.233)	1	1
	Phascolarctobacterium	40.172	42.356	1.184 (0.949-1.479)	0.138271	0.272591
	Alphaproteobacteria (c)	39.938	41.42	1.091 (0.900-1.323)	0.38923	0.521024
	Porphyromonadaceae (f)	39.86	37.988	0.825 (0.637-1.066)	0.145617	0.2791
	Slackia	39.626	36.271	0.815 (0.670-0.992)	0.041014	0.113199
	Victivallis	38.534	41.654	1.211 (0.995-1.475)	0.0569106	0.145438
	Intestinibacter	36.583	41.342	1.326 (1.092-1.612)	0.00396646	0.0246792
	Oxalobacter	35.491	36.505	1.078 (0.868-1.339)	0.519509	0.625669
	Turicibacter	34.321	30.577	0.778 (0.632-0.956)	0.0163528	0.0626857
	Romboutsia	33.931	30.031	0.805 (0.667-0.971)	0.0225237	0.0740064
	Bacteroidetes (p)	31.981	30.265	0.855 (0.671-1.088)	0.21103	0.346692
	Paraprevotella	31.903	31.903	1.000 (0.751-1.331)	1	1
	Adlercreutzia	31.747	30.343	0.924 (0.765-1.115)	0.424989	0.553288
	Enterobacteriaceae (f)	31.669	35.023	1.202 (0.998-1.448)	0.0523392	0.1389
	Sporobacter	29.329	30.655	1.108 (0.888-1.382)	0.380626	0.521024
	Senegalimassilia	29.095	25.351	0.750 (0.600-0.936)	0.0102397	0.0441586
	Catenibacterium	27.301	25.039	0.729 (0.537-0.985)	0.0392436	0.113199
	Veillonella	25.975	25.663	0.978 (0.792-1.209)	0.87474	0.92857
	Burkholderiales (o)	25.585	23.401	0.767 (0.578-1.014)	0.0634319	0.150924
	Desulfovibrionaceae (f)	24.571	23.791	0.922 (0.712-1.193)	0.566179	0.662142
	Howardella	23.089	21.763	0.857 (0.651-1.126)	0.281776	0.445903
	Citrobacter	23.011	23.713	1.046 (0.855-1.280)	0.68884	0.77496
	Clostridiales Incertae Sedis XII (f)	22.465	21.295	0.889 (0.689-1.145)	0.380679	0.521024
	Alloprevotella	22.309	20.749	0.798 (0.586-1.083)	0.154217	0.280025
	Desulfovibrio	21.685	23.479	1.193 (0.929-1.535)	0.173155	0.298692
	Prevotellaceae (f)	21.607	21.529	0.988 (0.722-1.352)	1	1
	Gordonibacter	20.983	19.111	0.866 (0.694-1.080)	0.208144	0.346692
	Dialister	20.593	23.401	1.212 (0.984-1.494)	0.0709352	0.163151
	Butyrivibrio	20.359	13.339	0.388 (0.280-0.530)	2.37527e-10	1.63894e-08
	Bifidobacterium	16.537	10.92	0.576 (0.445-0.743)	1.29077e-05	0.000296877
	Coraliomargarita	16.303	20.125	1.598 (1.203-2.132)	0.000960758	0.00828654
	Solobacterium	16.147	13.729	0.677 (0.486-0.937)	0.0177874	0.0645964
	Mogibacterium	15.913	19.267	1.344 (1.060-1.708)	0.0140027	0.0568345
	Mitsuokella	15.055	14.353	0.893 (0.645-1.234)	0.525925	0.625669
	Coprobacillus	14.197	19.189	1.525 (1.207-1.932)	0.00031641	0.0031189
	Acidaminococcus	13.183	13.651	1.076 (0.783-1.481)	0.696341	0.77496
	Rikenellaceae (f)	13.105	11.622	0.716 (0.484-1.053)	0.0928159	0.192203
	Actinomyces	13.027	16.069	1.307 (1.031-1.660)	0.0262511	0.0823329
	Fusibacter	12.949	16.147	1.471 (1.112-1.955)	0.00624045	0.0287061
	Anaerofilum	12.168	10.998	0.873 (0.664-1.147)	0.346346	0.497873
	Megasphaera	11.7	10.686	0.822 (0.574-1.173)	0.298071	0.451287
	Streptophyta (f)	10.998	7.644	0.642 (0.476-0.861)	0.00267675	0.0184696

## Sheet: Table S3
	Table S3: Changes in predicted metagenomics
	Given are predicted metagenomic pathway read counts for 1,282 SHIP-2 and paired 1,282 SHIP-3 samples. Only pathways that were present in at least 25% of SHIP-2 samples were analyzed. All pathways are ordered according to their p values in their respective superclass. Statistical significance was assessed by the Wilcoxon signed-rank test. Resulting p values were adjusted by the method of Benjamini…
		Superclass	SHIP-2 (%)	SHIP-3 (%)	Relative difference (%)	SHIP-2 (%)	SHIP-3 (%)	Statistic	p value	q value
			mean (sem)	mean (sem)	(SHIP-3/SHIP-2 -1) x 100	median (1st - 3rd quartile)	median (1st - 3rd quartile)
	coenzyme A biosynthesis I	Biosynthesis	7509.555 ± 21.895	7384.002 ± 21.190	-1.672	7550.460 (6975.271-8082.098)	7420.129 (6868.556-7941.098)	489269	3.9076e-09	1.24652e-06
	mevalonate pathway I	Biosynthesis	14.674 ± 1.280	16.894 ± 1.110	15.13	2.788 (0.280-10.406)	4.431 (0.938-15.987)	286921	9.41935e-08	5.00913e-06
	superpathway of geranylgeranyldiphosphate biosynthesis I (via mevalonate)	Biosynthesis	20.778 ± 1.776	23.973 ± 1.551	15.377	3.982 (0.400-14.856)	6.329 (1.340-22.816)	286922	9.42157e-08	5.00913e-06
	adenosine ribonucleotides de novo biosynthesis	Biosynthesis	9348.626 ± 26.936	9206.541 ± 26.783	-1.52	9437.355 (8688.946-10097.860)	9290.357 (8563.833-9948.643)	481290	1.24845e-07	5.68934e-06
	inosine-5'-phosphate biosynthesis I	Biosynthesis	8309.069 ± 25.250	8180.244 ± 24.857	-1.55	8375.983 (7723.641-8968.357)	8233.962 (7588.786-8817.523)	480793	1.53117e-07	6.10553e-06
	L-lysine biosynthesis II	Biosynthesis	1665.929 ± 30.438	1488.322 ± 27.208	-10.661	1473.285 (759.022-2355.372)	1291.100 (696.953-2074.515)	479107	3.02941e-07	1.07376e-05
	superpathway of L-serine and glycine biosynthesis I	Biosynthesis	8043.803 ± 23.873	7915.527 ± 23.812	-1.595	8098.107 (7486.472-8653.199)	7919.114 (7374.527-8512.346)	478412	3.99514e-07	1.27445e-05
	flavin biosynthesis I (bacteria and plants)	Biosynthesis	6618.021 ± 23.741	6493.734 ± 22.978	-1.878	6593.200 (6030.002-7177.247)	6504.747 (5923.532-7072.128)	477073	6.75781e-07	1.95977e-05
	tRNA charging	Biosynthesis	8083.835 ± 23.653	7966.486 ± 23.692	-1.452	8159.094 (7539.882-8715.766)	8017.052 (7417.201-8592.754)	476483	8.49239e-07	2.11848e-05
	peptidoglycan biosynthesis III (mycobacteria)	Biosynthesis	8062.794 ± 23.696	7952.223 ± 23.656	-1.371	8128.237 (7527.298-8703.890)	7995.391 (7385.223-8592.093)	475179	1.3976e-06	3.18454e-05
	peptidoglycan biosynthesis V (&beta;-lactam resistance)	Biosynthesis	129.623 ± 6.314	149.630 ± 6.764	15.434	38.565 (7.665-146.554)	56.365 (12.676-187.768)	316782	1.73685e-06	3.2156e-05
	thiazole biosynthesis II (Bacillus)	Biosynthesis	1478.039 ± 16.858	1564.566 ± 16.500	5.854	1371.777 (1081.438-1779.494)	1504.917 (1187.614-1845.988)	347806	1.74035e-06	3.2156e-05
	NAD salvage pathway I	Biosynthesis	6415.974 ± 23.979	6310.122 ± 22.091	-1.65	6430.445 (5844.124-7003.651)	6293.436 (5773.375-6843.293)	474508	1.79942e-06	3.2156e-05
	dTDP-N-acetylthomosamine biosynthesis	Biosynthesis	839.242 ± 28.778	961.671 ± 30.142	14.588	460.486 (218.781-1032.513)	585.609 (272.188-1181.453)	348174	1.99733e-06	3.2156e-05
	5-aminoimidazole ribonucleotide biosynthesis II	Biosynthesis	8492.240 ± 25.735	8373.919 ± 25.925	-1.393	8554.000 (7882.302-9190.440)	8434.919 (7765.178-9037.319)	474204	2.01605e-06	3.2156e-05
	superpathway of 5-aminoimidazole ribonucleotide biosynthesis	Biosynthesis	8492.240 ± 25.735	8373.919 ± 25.925	-1.393	8554.000 (7882.302-9190.440)	8434.919 (7765.178-9037.319)	474204	2.01605e-06	3.2156e-05
	polyisoprenoid biosynthesis (E. coli)	Biosynthesis	5703.934 ± 26.852	5585.296 ± 25.095	-2.08	5693.247 (5058.749-6320.388)	5591.421 (4976.485-6169.770)	473937	2.2268e-06	3.38261e-05
	peptidoglycan biosynthesis I (meso-diaminopimelate containing)	Biosynthesis	8115.502 ± 23.825	8004.885 ± 23.849	-1.363	8191.483 (7572.614-8764.727)	8042.237 (7441.577-8647.280)	473581	2.5409e-06	3.68431e-05
	UDP-N-acetylmuramoyl-pentapeptide biosynthesis II (lysine-containing)	Biosynthesis	8209.419 ± 24.133	8101.205 ± 24.063	-1.318	8281.798 (7657.824-8866.126)	8150.703 (7524.814-8745.312)	472569	3.68339e-06	4.89583e-05
	UDP-N-acetylmuramoyl-pentapeptide biosynthesis I (meso-diaminopimelate containing)	Biosynthesis	8212.493 ± 24.329	8102.532 ± 24.393	-1.339	8276.789 (7656.594-8864.196)	8150.769 (7530.900-8744.967)	472410	3.90267e-06	4.97981e-05
	5-aminoimidazole ribonucleotide biosynthesis I	Biosynthesis	8659.667 ± 27.113	8547.673 ± 27.188	-1.293	8702.601 (8013.327-9381.682)	8587.829 (7901.452-9253.759)	470673	7.27468e-06	8.47163e-05
	superpathway of geranylgeranyl diphosphate biosynthesis II (via MEP)	Biosynthesis	7974.192 ± 24.402	7871.928 ± 24.207	-1.282	8061.719 (7382.246-8623.065)	7934.880 (7283.897-8524.343)	469691	1.02693e-05	0.00011019
	superpathway of L-threonine biosynthesis	Biosynthesis	8812.261 ± 28.495	8695.348 ± 28.774	-1.327	8817.137 (8121.191-9520.757)	8696.795 (8007.630-9405.968)	469665	1.03627e-05	0.00011019
	methylerythritol phosphate pathway I	Biosynthesis	8410.156 ± 25.912	8304.327 ± 25.861	-1.258	8435.283 (7777.225-9086.161)	8340.206 (7689.386-8987.159)	468866	1.36635e-05	0.000132081
	methylerythritol phosphate pathway II	Biosynthesis	8410.156 ± 25.912	8304.327 ± 25.861	-1.258	8435.283 (7777.225-9086.161)	8340.206 (7689.386-8987.159)	468866	1.36635e-05	0.000132081
	S-adenosyl-L-methionine cycle I	Biosynthesis	5354.581 ± 28.898	5223.701 ± 26.947	-2.444	5359.319 (4619.646-6033.878)	5186.924 (4568.848-5867.675)	468696	1.4485e-05	0.000135903
	guanosine ribonucleotides de novo biosynthesis	Biosynthesis	8275.957 ± 25.095	8177.561 ± 25.113	-1.189	8317.942 (7677.813-8941.902)	8230.447 (7576.959-8823.780)	467865	1.92255e-05	0.000170359
	enterobactin biosynthesis	Biosynthesis	216.952 ± 12.270	266.311 ± 14.296	22.751	24.556 (0.000-190.907)	42.087 (0.160-276.404)	278708	2.38048e-05	0.000200467
	superpathway of adenosine nucleotides de novo biosynthesis I	Biosynthesis	9204.903 ± 32.588	9083.232 ± 32.756	-1.322	9208.679 (8414.718-10030.978)	9115.754 (8280.286-9891.694)	466893	2.66456e-05	0.000215205
	thiamin salvage II	Biosynthesis	6299.094 ± 23.437	6192.832 ± 22.940	-1.687	6215.530 (5756.373-6757.356)	6144.706 (5650.038-6643.788)	466365	3.17459e-05	0.000246999
	superpathway of adenosine nucleotides de novo biosynthesis II	Biosynthesis	8875.531 ± 32.125	8756.287 ± 32.411	-1.344	8913.749 (8105.005-9716.389)	8820.651 (8002.115-9593.347)	466234	3.3148e-05	0.000251767
	N10-formyl-tetrahydrofolate biosynthesis	Biosynthesis	7159.934 ± 24.115	7069.289 ± 23.221	-1.266	7161.211 (6578.821-7750.454)	7047.744 (6532.259-7592.495)	465886	3.7164e-05	0.000269439
	lipid IVA biosynthesis	Biosynthesis	3913.038 ± 30.775	3791.250 ± 28.697	-3.112	3827.583 (3144.643-4535.891)	3702.865 (3089.721-4427.112)	464615	5.61157e-05	0.00038915
	Kdo transfer to lipid IVA III (Chlamydia)	Biosynthesis	3612.899 ± 29.734	3503.590 ± 28.370	-3.026	3519.895 (2881.622-4219.448)	3391.230 (2806.805-4095.965)	464385	6.04036e-05	0.000409973
	GDP-mannose biosynthesis	Biosynthesis	6700.324 ± 30.707	6577.426 ± 29.454	-1.834	6746.972 (5916.453-7457.912)	6560.967 (5872.893-7277.915)	463955	6.92649e-05	0.000460323
	enterobacterial common antigen biosynthesis	Biosynthesis	129.656 ± 8.179	162.714 ± 9.982	25.496	12.238 (0.000-95.493)	20.837 (0.500-141.179)	286992	7.99242e-05	0.000520323
	gluconeogenesis I	Biosynthesis	7787.648 ± 28.289	7697.061 ± 27.592	-1.163	7726.297 (7128.154-8364.719)	7647.376 (7033.797-8263.645)	463386	8.2892e-05	0.000528851
	UMP biosynthesis	Biosynthesis	8767.504 ± 26.734	8665.439 ± 26.067	-1.164	8873.945 (8159.036-9452.197)	8743.594 (8074.851-9354.383)	462780	0.000100172	0.000614032
	superpathway of pyrimidine nucleobases salvage	Biosynthesis	9578.011 ± 29.972	9473.347 ± 30.295	-1.093	9623.423 (8872.861-10352.257)	9501.433 (8737.671-10238.612)	462661	0.000103943	0.000614032
	polymyxin resistance	Biosynthesis	76.158 ± 4.916	94.237 ± 6.038	23.74	13.209 (2.155-60.587)	20.906 (3.650-80.131)	324683	0.000127017	0.000698596
	chorismate biosynthesis from 3-dehydroquinate	Biosynthesis	8271.979 ± 25.112	8183.995 ± 24.846	-1.064	8364.262 (7694.054-8923.146)	8254.551 (7624.018-8808.300)	461843	0.000133721	0.000722999
	L-lysine biosynthesis III	Biosynthesis	8868.391 ± 27.112	8778.668 ± 27.181	-1.012	8937.736 (8206.994-9596.479)	8869.450 (8141.400-9477.842)	459333	0.000283212	0.00147005
	L-ornithine biosynthesis	Biosynthesis	6191.833 ± 21.942	6108.502 ± 22.699	-1.346	6212.571 (5663.644-6723.776)	6125.424 (5567.531-6640.697)	458557	0.000354722	0.00171449
	1,4-dihydroxy-6-naphthoate biosynthesis I	Biosynthesis	280.398 ± 6.439	300.826 ± 6.325	7.285	234.297 (97.705-413.700)	268.607 (119.178-448.803)	351531	0.000405941	0.00190434
	6-hydroxymethyl-dihydropterin diphosphate biosynthesis III (Chlamydia)	Biosynthesis	5584.698 ± 29.212	5484.124 ± 27.603	-1.801	5518.355 (4855.464-6219.286)	5393.328 (4792.775-6092.833)	457363	0.000498414	0.00227134
	superpathway of lipopolysaccharide biosynthesis	Biosynthesis	66.365 ± 5.592	83.984 ± 6.538	26.549	0.000 (0.000-30.923)	0.000 (0.000-53.118)	136356	0.000742791	0.00329098
	fatty acid elongation -- saturated	Biosynthesis	7509.727 ± 45.248	7371.065 ± 43.283	-1.846	7351.477 (6406.904-8401.723)	7241.781 (6297.154-8281.327)	455707	0.000788767	0.0034468
	aerobactin biosynthesis	Biosynthesis	18.606 ± 1.659	27.136 ± 2.686	45.841	0.000 (0.000-7.026)	0.000 (0.000-13.000)	146778	0.000849392	0.00366157
	CDP-diacylglycerol biosynthesis I	Biosynthesis	9014.232 ± 27.459	8922.200 ± 27.350	-1.021	9082.282 (8381.992-9703.231)	8989.318 (8287.437-9582.671)	454804	0.00100687	0.00406572
	CDP-diacylglycerol biosynthesis II	Biosynthesis	9014.232 ± 27.459	8922.200 ± 27.350	-1.021	9082.282 (8381.992-9703.231)	8989.318 (8287.437-9582.671)	454804	0.00100687	0.00406572
	superpathway of phospholipid biosynthesis I (bacteria)	Biosynthesis	7951.289 ± 23.457	7872.946 ± 22.984	-0.985	7994.194 (7392.839-8557.047)	7927.615 (7326.364-8457.178)	454562	0.00107416	0.00428319
	superpathway of thiamin diphosphate biosynthesis II	Biosynthesis	3436.375 ± 23.031	3525.868 ± 21.590	2.604	3398.509 (2916.014-3917.273)	3474.293 (3024.449-3977.083)	367958	0.00110816	0.00434123
	pantothenate and coenzyme A biosynthesis I	Biosynthesis	6155.326 ± 23.438	6093.297 ± 22.785	-1.008	6115.529 (5614.275-6728.773)	6071.432 (5541.991-6617.334)	454396	0.00112269	0.00434123
	L-histidine biosynthesis	Biosynthesis	7802.748 ± 26.671	7723.953 ± 26.482	-1.01	7838.531 (7184.550-8494.697)	7781.775 (7090.404-8379.094)	454144	0.00120025	0.0045581
	taxadiene biosynthesis (engineered)	Biosynthesis	1348.408 ± 30.690	1456.979 ± 32.376	8.052	1089.738 (431.654-2031.397)	1197.699 (497.622-2147.739)	368653	0.00133149	0.00499702
	adenine and adenosine salvage III	Biosynthesis	7285.523 ± 28.725	7180.768 ± 27.608	-1.438	7336.036 (6558.112-8034.972)	7200.266 (6522.975-7897.904)	452803	0.00170292	0.00631664
	CMP-3-deoxy-D-manno-octulosonate biosynthesis I	Biosynthesis	3939.857 ± 29.966	3858.907 ± 28.521	-2.055	3845.515 (3176.364-4591.953)	3749.132 (3123.303-4500.391)	452417	0.00187999	0.00681495
	superpathway of L-isoleucine biosynthesis I	Biosynthesis	8754.148 ± 27.600	8678.454 ± 27.640	-0.865	8776.603 (8064.406-9483.205)	8703.992 (8020.720-9381.387)	452224	0.00197472	0.00704552
	superpathway of (Kdo)2-lipid A biosynthesis	Biosynthesis	437.539 ± 20.386	480.142 ± 20.481	9.737	105.267 (10.592-527.741)	149.842 (15.895-615.667)	337734	0.00198777	0.00704552
	superpathway of L-methionine biosynthesis (by sulfhydrylation)	Biosynthesis	1498.730 ± 23.651	1589.613 ± 23.908	6.064	1391.971 (898.343-1969.678)	1471.339 (986.137-2089.790)	370521	0.00215343	0.00750279
	chorismate biosynthesis I	Biosynthesis	8234.310 ± 24.971	8170.709 ± 24.662	-0.772	8327.451 (7639.914-8875.924)	8256.031 (7623.569-8803.041)	451699	0.00225503	0.00765271
	superpathway of aromatic amino acid biosynthesis	Biosynthesis	8562.204 ± 25.749	8495.224 ± 25.450	-0.782	8636.474 (7957.735-9229.405)	8572.542 (7938.208-9136.665)	451238	0.00253075	0.00840946
	NAD salvage pathway II	Biosynthesis	444.080 ± 11.738	487.566 ± 13.115	9.792	309.208 (173.761-563.447)	341.555 (194.220-619.918)	371547	0.00278221	0.00905638
	6-hydroxymethyl-dihydropterin diphosphate biosynthesis I	Biosynthesis	5378.412 ± 27.208	5298.165 ± 25.828	-1.492	5313.833 (4689.593-5980.072)	5237.704 (4628.927-5886.920)	450674	0.00290987	0.00937625
	L-methionine biosynthesis III	Biosynthesis	2655.220 ± 28.164	2581.508 ± 27.958	-2.776	2591.390 (1956.509-3270.105)	2434.634 (1893.364-3095.442)	449614	0.00376565	0.0120124
	tRNA processing	Biosynthesis	1602.729 ± 21.591	1534.585 ± 20.280	-4.252	1590.714 (1026.733-2103.568)	1475.094 (1014.812-1994.160)	449150	0.00420768	0.0131593
	superpathway of UDP-glucose-derived O-antigen building blocks biosynthesis	Biosynthesis	1646.366 ± 20.962	1722.356 ± 21.323	4.616	1571.132 (1098.926-2147.867)	1664.381 (1172.791-2196.869)	374101	0.00513885	0.0153205
	superpathway of L-methionine biosynthesis (transsulfuration)	Biosynthesis	3929.383 ± 35.352	3842.459 ± 33.979	-2.212	3955.480 (3083.662-4759.671)	3798.867 (2996.591-4581.985)	447864	0.00568943	0.0166507
	superpathway of L-phenylalanine biosynthesis	Biosynthesis	4198.828 ± 40.463	4073.796 ± 40.949	-2.978	4285.316 (3197.481-5208.538)	4118.350 (3130.842-4997.486)	447808	0.00576354	0.0166682
	chorismate biosynthesis II (archaea)	Biosynthesis	14.262 ± 0.942	16.602 ± 0.984	16.407	0.000 (0.000-11.713)	0.000 (0.000-19.854)	102561	0.00579989	0.0166682
	pyrimidine deoxyribonucleotides de novo biosynthesis III	Biosynthesis	2784.620 ± 18.527	2846.297 ± 17.747	2.215	2802.600 (2374.823-3206.657)	2869.606 (2418.620-3256.971)	374664	0.00585604	0.0166793
	L-lysine biosynthesis VI	Biosynthesis	8543.501 ± 27.274	8475.264 ± 27.043	-0.799	8582.440 (7846.144-9264.559)	8532.247 (7796.652-9154.551)	447276	0.00651213	0.0180641
	superpathway of L-lysine, L-threonine and L-methionine biosynthesis I	Biosynthesis	4097.783 ± 25.904	4029.403 ± 24.078	-1.669	4135.448 (3520.755-4705.067)	4033.055 (3480.298-4573.867)	447164	0.00668046	0.0182142
	pyrimidine deoxyribonucleosides salvage	Biosynthesis	5254.780 ± 24.369	5172.716 ± 23.207	-1.562	5269.753 (4649.191-5870.734)	5184.023 (4595.788-5762.413)	447089	0.00679536	0.0183705
	superpathway of L-tyrosine biosynthesis	Biosynthesis	4139.542 ± 39.416	4021.036 ± 39.946	-2.863	4242.327 (3176.907-5124.044)	4068.022 (3105.286-4929.907)	446807	0.00724342	0.0192554
	L-methionine biosynthesis I	Biosynthesis	2323.057 ± 26.732	2261.091 ± 26.568	-2.667	2254.671 (1628.399-2910.542)	2153.566 (1588.800-2780.621)	446765	0.00731237	0.0192781
	cis-vaccenate biosynthesis	Biosynthesis	9885.099 ± 33.406	9796.973 ± 33.676	-0.892	9893.863 (9082.912-10698.394)	9833.720 (8983.180-10578.217)	446219	0.00826393	0.0209222
	L-arginine biosynthesis II (acetyl cycle)	Biosynthesis	6879.889 ± 25.470	6820.354 ± 25.752	-0.865	6923.921 (6289.243-7467.177)	6858.248 (6203.132-7411.432)	445470	0.0097492	0.0244881
	heme biosynthesis II (anaerobic)	Biosynthesis	1468.622 ± 22.197	1402.588 ± 21.050	-4.496	1367.301 (886.823-1900.874)	1295.023 (852.231-1847.648)	445060	0.0106592	0.0265648
	superpathway of GDP-mannose-derived O-antigen building blocks biosynthesis	Biosynthesis	4936.554 ± 32.095	4868.464 ± 30.629	-1.379	4863.406 (4139.916-5692.167)	4819.877 (4088.954-5605.558)	444724	0.0114605	0.0281223
	tetrapyrrole biosynthesis II (from glycine)	Biosynthesis	2529.692 ± 21.747	2466.425 ± 21.578	-2.501	2451.816 (2013.677-3023.191)	2374.582 (1922.765-2911.776)	444637	0.0116765	0.0284337
	L-isoleucine biosynthesis IV	Biosynthesis	9450.128 ± 29.194	9382.655 ± 29.018	-0.714	9508.387 (8787.556-10211.032)	9435.317 (8728.479-10103.351)	444550	0.0118961	0.028749
	L-isoleucine biosynthesis II	Biosynthesis	9898.412 ± 31.964	9824.258 ± 31.485	-0.749	9925.613 (9139.086-10735.365)	9848.146 (9090.837-10601.450)	444316	0.0125051	0.0297695
	phosphatidylglycerol biosynthesis I (plastidic)	Biosynthesis	7260.475 ± 25.633	7207.107 ± 24.723	-0.735	7279.630 (6651.740-7907.738)	7235.204 (6616.649-7826.634)	444226	0.0127452	0.0298949
	phosphatidylglycerol biosynthesis II (non-plastidic)	Biosynthesis	7260.475 ± 25.633	7207.107 ± 24.723	-0.735	7279.630 (6651.740-7907.738)	7235.204 (6616.649-7826.634)	444226	0.0127452	0.0298949
	superpathway of polyamine biosynthesis I	Biosynthesis	1366.169 ± 15.023	1406.252 ± 15.702	2.934	1328.022 (1010.281-1684.519)	1348.091 (1018.627-1720.810)	378741	0.0143558	0.033427
	fatty acid salvage	Biosynthesis	175.375 ± 10.395	153.232 ± 9.431	-12.626	0.000 (0.000-180.569)	0.000 (0.000-135.524)	199952	0.0187274	0.0417764
	superpathway of menaquinol-7 biosynthesis	Biosynthesis	691.146 ± 19.880	746.038 ± 20.786	7.942	439.266 (196.104-937.392)	490.338 (226.862-995.943)	380369	0.0200481	0.0437694
	superpathway of menaquinol-8 biosynthesis I	Biosynthesis	690.365 ± 19.986	744.493 ± 20.839	7.841	437.695 (195.639-933.169)	488.168 (226.792-994.035)	380510	0.0206232	0.0437694
	superpathway of menaquinol-11 biosynthesis	Biosynthesis	635.567 ± 19.104	687.291 ± 20.011	8.138	389.383 (172.938-850.552)	436.984 (200.014-903.202)	380512	0.0206315	0.0437694
	superpathway of menaquinol-12 biosynthesis	Biosynthesis	635.567 ± 19.104	687.291 ± 20.011	8.138	389.383 (172.938-850.552)	436.984 (200.014-903.202)	380512	0.0206315	0.0437694
	superpathway of menaquinol-13 biosynthesis	Biosynthesis	635.567 ± 19.104	687.291 ± 20.011	8.138	389.383 (172.938-850.552)	436.984 (200.014-903.202)	380512	0.0206315	0.0437694
	thiazole biosynthesis I (E. coli)	Biosynthesis	5391.676 ± 30.252	5460.847 ± 28.273	1.283	5336.434 (4620.035-6108.293)	5451.778 (4701.967-6126.861)	380671	0.0212975	0.0441867
	inosine-5'-phosphate biosynthesis III	Biosynthesis	2485.593 ± 29.085	2408.825 ± 26.522	-3.089	2459.321 (1709.473-3224.366)	2345.323 (1716.634-3051.901)	441724	0.0213315	0.0441867
	superpathway of phylloquinol biosynthesis	Biosynthesis	327.789 ± 12.821	359.814 ± 13.641	9.77	159.792 (68.747-382.514)	181.092 (78.990-417.318)	380773	0.0217345	0.0446392
	superpathway of demethylmenaquinol-8 biosynthesis	Biosynthesis	531.333 ± 17.410	574.957 ± 18.099	8.21	303.933 (133.869-682.361)	342.539 (154.362-730.290)	380795	0.0218298	0.0446392
	1,4-dihydroxy-2-naphthoate biosynthesis I	Biosynthesis	292.822 ± 11.765	321.955 ± 12.577	9.949	140.202 (60.237-336.793)	159.022 (69.216-368.287)	380828	0.0219734	0.0446466
	superpathway of L-aspartate and L-asparagine biosynthesis	Biosynthesis	7853.054 ± 57.130	7783.596 ± 58.874	-0.884	7380.146 (6561.948-8422.562)	7194.035 (6425.605-8354.805)	441417	0.0226724	0.0454874
	superpathway of (R,R)-butanediol biosynthesis	Biosynthesis	256.686 ± 9.803	281.023 ± 10.716	9.481	114.166 (44.125-314.513)	128.271 (47.974-354.144)	381124	0.0233009	0.0464563
	superpathway of arginine and polyamine biosynthesis	Biosynthesis	2217.139 ± 20.697	2269.787 ± 21.208	2.375	2212.438 (1727.598-2698.142)	2238.886 (1743.865-2737.168)	381372	0.0244618	0.0475813
	tetrapyrrole biosynthesis I (from glutamate)	Biosynthesis	2739.525 ± 22.438	2684.355 ± 22.535	-2.014	2665.380 (2204.620-3230.293)	2578.505 (2126.605-3149.930)	440340	0.027972	0.0538955
	L-isoleucine biosynthesis I (from threonine)	Biosynthesis	9076.889 ± 29.409	9018.028 ± 28.716	-0.648	9112.302 (8389.671-9848.412)	9030.983 (8345.142-9731.469)	440295	0.0282149	0.0538955
	L-valine biosynthesis	Biosynthesis	9076.889 ± 29.409	9018.028 ± 28.716	-0.648	9112.302 (8389.671-9848.412)	9030.983 (8345.142-9731.469)	440295	0.0282149	0.0538955
	L-arginine biosynthesis IV (archaebacteria)	Biosynthesis	7028.489 ± 24.584	6981.873 ± 24.411	-0.663	7090.768 (6457.533-7600.975)	7024.925 (6396.959-7573.992)	439566	0.0324112	0.0603724
	phosphopantothenate biosynthesis I	Biosynthesis	5723.384 ± 27.215	5680.289 ± 26.596	-0.753	5640.010 (5077.608-6351.989)	5606.447 (5044.767-6253.933)	439543	0.0325519	0.0603724
	L-arginine biosynthesis I (via L-ornithine)	Biosynthesis	7020.151 ± 24.659	6973.686 ± 24.515	-0.662	7075.810 (6446.230-7592.662)	7016.933 (6377.524-7570.164)	439416	0.033338	0.061473
	superpathway of tetrahydrofolate biosynthesis and salvage	Biosynthesis	6042.826 ± 26.667	5997.109 ± 24.848	-0.757	6000.910 (5416.073-6653.555)	6002.958 (5378.257-6565.155)	439078	0.0355099	0.0651015
	superpathway of pyrimidine ribonucleotides de novo biosynthesis	Biosynthesis	5638.972 ± 36.084	5581.787 ± 34.475	-1.014	5621.843 (4767.576-6501.840)	5545.332 (4653.150-6414.881)	438616	0.038673	0.0696987
	adenosine deoxyribonucleotides de novo biosynthesis II	Biosynthesis	8835.853 ± 56.967	8753.525 ± 57.423	-0.932	8511.774 (7517.092-9900.808)	8542.897 (7385.326-9882.324)	438255	0.0413083	0.0732341
	guanosine deoxyribonucleotides de novo biosynthesis II	Biosynthesis	8835.853 ± 56.967	8753.525 ± 57.423	-0.932	8511.774 (7517.092-9900.808)	8542.897 (7385.326-9882.324)	438255	0.0413083	0.0732341
	superpathway of purine nucleotides de novo biosynthesis II	Biosynthesis	5860.423 ± 35.869	5807.896 ± 34.286	-0.896	5820.112 (4984.367-6687.810)	5755.175 (4892.181-6605.371)	438253	0.0413233	0.0732341
	pyrimidine deoxyribonucleotides biosynthesis from CTP	Biosynthesis	274.695 ± 9.253	285.650 ± 9.104	3.988	152.759 (63.954-337.846)	175.836 (72.205-366.474)	383002	0.0418548	0.0737663
	pyrimidine deoxyribonucleotides de novo biosynthesis IV	Biosynthesis	208.779 ± 7.561	216.020 ± 7.365	3.468	109.245 (45.079-246.665)	125.451 (50.886-267.077)	383499	0.0457831	0.0802462
	gondoate biosynthesis (anaerobic)	Biosynthesis	10434.380 ± 40.161	10372.331 ± 40.150	-0.595	10362.605 (9454.941-11287.636)	10315.801 (9392.190-11273.599)	437648	0.0460862	0.0803361
	superpathway of 2,3-butanediol biosynthesis	Biosynthesis	74.282 ± 2.773	80.041 ± 2.953	7.753	43.334 (15.541-94.525)	45.382 (18.642-103.503)	381785	0.0467108	0.0809824
	superpathway of purine nucleotides de novo biosynthesis I	Biosynthesis	5755.014 ± 35.904	5705.617 ± 34.275	-0.858	5722.543 (4871.877-6574.678)	5658.875 (4780.986-6496.312)	437408	0.0480938	0.0828794
	superpathway of thiamin diphosphate biosynthesis I	Biosynthesis	5552.698 ± 31.284	5493.596 ± 30.469	-1.064	5439.436 (4804.403-6254.527)	5390.734 (4744.360-6151.828)	437381	0.0483247	0.0828794
	glycogen biosynthesis I (from ADP-D-Glucose)	Biosynthesis	8171.814 ± 29.825	8128.611 ± 27.287	-0.529	8228.224 (7493.551-8926.253)	8197.108 (7490.886-8821.047)	437210	0.0498085	0.0848008
	UDP-N-acetyl-D-glucosamine biosynthesis I	Biosynthesis	5421.476 ± 24.218	5377.267 ± 24.375	-0.815	5424.791 (4831.177-6002.388)	5377.681 (4768.347-5978.990)	437149	0.050347	0.0848008
	superpathway of pyridoxal 5'-phosphate biosynthesis and salvage	Biosynthesis	2470.771 ± 35.105	2557.096 ± 33.203	3.494	2335.461 (1493.993-3289.607)	2458.042 (1720.740-3320.435)	385272	0.0505068	0.0848008
	superpathway of branched amino acid biosynthesis	Biosynthesis	8668.913 ± 28.282	8619.802 ± 27.949	-0.567	8724.206 (7984.176-9411.539)	8664.041 (7964.025-9351.457)	437101	0.0507741	0.0848008
	O-antigen building blocks biosynthesis (E. coli)	Biosynthesis	5950.352 ± 20.271	5913.605 ± 20.461	-0.618	5972.985 (5426.000-6481.032)	5955.546 (5398.715-6459.452)	436123	0.0601599	0.0999531
	superpathway of demethylmenaquinol-6 biosynthesis I	Biosynthesis	313.998 ± 12.591	344.301 ± 14.068	9.651	143.045 (59.425-359.968)	156.968 (61.472-393.666)	386514	0.0626072	0.103244
	superpathway of demethylmenaquinol-9 biosynthesis	Biosynthesis	314.062 ± 12.591	344.303 ± 14.068	9.629	143.045 (59.756-359.968)	156.968 (61.472-393.666)	386603	0.0635593	0.103977
	superpathway of menaquinol-6 biosynthesis I	Biosynthesis	422.654 ± 15.520	457.597 ± 16.830	8.267	211.013 (88.645-515.551)	229.437 (91.525-558.269)	387014	0.0681129	0.109186
	superpathway of menaquinol-10 biosynthesis	Biosynthesis	422.654 ± 15.520	457.597 ± 16.830	8.267	211.013 (88.645-515.551)	229.437 (91.525-558.269)	387014	0.0681129	0.109186
	superpathway of menaquinol-9 biosynthesis	Biosynthesis	422.745 ± 15.519	457.600 ± 16.830	8.245	211.013 (89.292-515.551)	229.437 (91.525-558.269)	387108	0.0691911	0.11036
	norspermidine biosynthesis	Biosynthesis	51.449 ± 5.703	67.462 ± 7.457	31.124	0.000 (0.000-9.585)	0.000 (0.000-11.949)	123850	0.0722153	0.114043
	pyridoxal 5'-phosphate biosynthesis I	Biosynthesis	2037.163 ± 31.833	2099.523 ± 29.898	3.061	1866.876 (1159.695-2734.499)	1957.467 (1334.517-2735.296)	387643	0.0755981	0.118797
	superpathway of pyrimidine ribonucleosides salvage	Biosynthesis	4988.758 ± 38.006	4943.558 ± 36.061	-0.906	4949.908 (4043.677-5855.189)	4863.603 (3976.927-5795.845)	433458	0.0932266	0.144366
	superpathway of tetrahydrofolate biosynthesis	Biosynthesis	5289.154 ± 26.020	5250.938 ± 24.097	-0.723	5235.407 (4665.322-5893.197)	5258.470 (4652.842-5807.329)	433042	0.0995085	0.152612
	superpathway of guanosine nucleotides de novo biosynthesis II	Biosynthesis	4869.964 ± 37.073	4832.802 ± 35.637	-0.763	4811.201 (3942.043-5696.044)	4746.536 (3879.686-5627.843)	432826	0.102901	0.157059
	superpathway of guanosine nucleotides de novo biosynthesis I	Biosynthesis	4511.091 ± 35.983	4475.528 ± 34.608	-0.788	4435.433 (3607.154-5312.342)	4378.204 (3551.306-5245.403)	432706	0.104825	0.158479
	photorespiration	Biosynthesis	308.863 ± 13.371	281.690 ± 12.574	-8.798	85.675 (0.000-441.684)	78.248 (0.000-407.227)	262881	0.107221	0.161337
	superpathway of heme biosynthesis from glycine	Biosynthesis	329.400 ± 10.846	347.622 ± 10.872	5.532	191.282 (39.271-472.149)	225.729 (57.108-490.226)	379976	0.116538	0.174534
	L-isoleucine biosynthesis III	Biosynthesis	8457.490 ± 27.665	8420.300 ± 27.118	-0.44	8487.106 (7795.242-9182.852)	8458.397 (7797.469-9123.019)	431860	0.119212	0.177703
	ubiquinol-7 biosynthesis (prokaryotic)	Biosynthesis	515.686 ± 13.362	536.654 ± 13.813	4.066	360.918 (147.720-767.240)	399.190 (171.665-747.063)	390712	0.122263	0.178908
	ubiquinol-9 biosynthesis (prokaryotic)	Biosynthesis	515.686 ± 13.362	536.654 ± 13.813	4.066	360.918 (147.720-767.240)	399.190 (171.665-747.063)	390712	0.122263	0.178908
	ubiquinol-10 biosynthesis (prokaryotic)	Biosynthesis	515.686 ± 13.362	536.654 ± 13.813	4.066	360.918 (147.720-767.240)	399.190 (171.665-747.063)	390712	0.122263	0.178908
	ubiquinol-8 biosynthesis (prokaryotic)	Biosynthesis	515.686 ± 13.362	536.654 ± 13.813	4.066	360.918 (147.720-767.240)	399.190 (171.665-747.063)	390712	0.122263	0.178908
	pyrimidine deoxyribonucleotides de novo biosynthesis II	Biosynthesis	4480.088 ± 25.370	4446.861 ± 24.329	-0.742	4507.897 (3841.891-5098.356)	4450.721 (3796.152-5059.026)	431589	0.124134	0.180816
	superpathway of ubiquinol-8 biosynthesis (prokaryotic)	Biosynthesis	513.389 ± 13.411	533.685 ± 13.824	3.953	357.053 (146.414-765.250)	397.550 (166.627-744.413)	390964	0.126926	0.184042
	superpathway of pyrimidine deoxyribonucleotides de novo biosynthesis (E. coli)	Biosynthesis	4444.642 ± 25.935	4416.035 ± 24.857	-0.644	4467.876 (3799.736-5076.606)	4410.636 (3752.142-5027.712)	430920	0.136964	0.196808
	pyrimidine deoxyribonucleotide phosphorylation	Biosynthesis	3378.318 ± 27.894	3350.149 ± 26.305	-0.834	3310.082 (2689.762-3985.659)	3291.728 (2643.765-3960.279)	430203	0.151825	0.215254
	cob(II)yrinate a,c-diamide biosynthesis I (early cobalt insertion)	Biosynthesis	403.932 ± 18.210	442.849 ± 19.603	9.635	125.737 (23.214-507.158)	140.743 (26.504-544.076)	367288	0.153077	0.216069
	superpathway of pyrimidine deoxyribonucleoside salvage	Biosynthesis	3773.353 ± 22.915	3750.364 ± 21.851	-0.609	3761.586 (3209.041-4349.164)	3732.011 (3165.633-4284.922)	429870	0.159131	0.22352
	L-arginine biosynthesis III (via N-acetyl-L-citrulline)	Biosynthesis	4770.544 ± 35.596	4745.521 ± 33.873	-0.525	4721.445 (3877.086-5625.508)	4714.239 (3917.695-5570.383)	429842	0.159758	0.22352
	pyrimidine deoxyribonucleotides de novo biosynthesis I	Biosynthesis	3558.926 ± 28.509	3533.983 ± 27.361	-0.701	3510.528 (2828.935-4241.633)	3484.704 (2791.066-4186.482)	429284	0.17263	0.239116
	peptidoglycan biosynthesis II (staphylococci)	Biosynthesis	217.970 ± 12.167	243.026 ± 14.288	11.495	44.523 (0.000-224.474)	46.783 (0.000-245.573)	258909	0.188012	0.258517
	superpathway of L-alanine biosynthesis	Biosynthesis	1975.808 ± 30.003	1929.599 ± 29.990	-2.339	1913.730 (1177.759-2656.626)	1805.993 (1158.415-2506.270)	428003	0.205089	0.280788
	NAD biosynthesis I (from aspartate)	Biosynthesis	6366.240 ± 23.346	6344.762 ± 22.273	-0.337	6412.916 (5789.821-6967.589)	6377.802 (5793.192-6908.011)	427891	0.208125	0.283727
	dTDP-L-rhamnose biosynthesis I	Biosynthesis	8270.926 ± 38.591	8271.475 ± 39.245	0.007	8144.372 (7313.912-9047.587)	8122.041 (7293.437-9041.920)	427709	0.213128	0.288084
	superpathway of L-tryptophan biosynthesis	Biosynthesis	858.704 ± 36.966	885.527 ± 34.672	3.124	141.591 (5.995-1204.250)	239.399 (9.588-1283.419)	331711	0.218763	0.293216
	L-glutamate and L-glutamine biosynthesis	Biosynthesis	5486.986 ± 35.291	5454.260 ± 35.160	-0.596	5463.234 (4693.982-6296.426)	5513.040 (4620.421-6301.652)	426599	0.245524	0.326329
	biotin biosynthesis I	Biosynthesis	3684.157 ± 42.705	3738.465 ± 40.926	1.474	3479.553 (2635.243-4576.202)	3522.041 (2724.107-4538.022)	395837	0.246537	0.326329
	8-amino-7-oxononanoate biosynthesis I	Biosynthesis	3892.529 ± 47.577	3947.334 ± 45.720	1.408	3612.889 (2682.459-4844.594)	3649.110 (2798.066-4863.223)	395976	0.250838	0.33065
	CMP-legionaminate biosynthesis I	Biosynthesis	881.542 ± 16.813	907.548 ± 16.277	2.95	738.705 (441.546-1138.982)	793.184 (478.519-1215.175)	396094	0.254529	0.334084
	superpathway of polyamine biosynthesis II	Biosynthesis	939.881 ± 11.338	962.087 ± 11.520	2.363	918.645 (655.559-1197.586)	925.679 (675.126-1181.106)	396924	0.281562	0.365115
	superpathway of pyrimidine deoxyribonucleotides de novo biosynthesis	Biosynthesis	3634.032 ± 31.873	3608.915 ± 29.195	-0.691	3606.781 (2833.972-4430.672)	3555.265 (2882.630-4305.920)	425341	0.286239	0.368187
	superpathway of UDP-N-acetylglucosamine-derived O-antigen building blocks biosynthesis	Biosynthesis	1182.175 ± 27.175	1215.439 ± 25.907	2.814	936.355 (393.993-1710.978)	997.885 (479.126-1750.674)	396631	0.292892	0.375231
	L-lysine biosynthesis I	Biosynthesis	6662.842 ± 25.705	6650.955 ± 25.014	-0.178	6691.968 (6011.788-7312.428)	6679.315 (6034.205-7265.125)	424864	0.302808	0.386383
	teichoic acid (poly-glycerol) biosynthesis	Biosynthesis	780.273 ± 14.869	762.635 ± 14.214	-2.26	639.017 (407.109-993.823)	642.132 (404.843-964.010)	423767	0.343286	0.42978
	adenosylcobalamin salvage from cobinamide II	Biosynthesis	5590.020 ± 24.688	5567.709 ± 22.784	-0.399	5583.010 (5012.500-6150.783)	5554.671 (4990.895-6135.364)	423741	0.344286	0.42978
	adenosylcobalamin biosynthesis from cobyrinate a,c-diamide I	Biosynthesis	5564.268 ± 24.730	5541.970 ± 22.821	-0.401	5559.196 (4984.026-6123.118)	5526.862 (4964.009-6106.714)	423725	0.344902	0.42978
	adenosylcobalamin salvage from cobinamide I	Biosynthesis	5692.257 ± 24.725	5670.444 ± 22.807	-0.383	5681.712 (5119.086-6262.729)	5654.956 (5099.751-6222.723)	423585	0.350322	0.434836
	adenosylcobalamin biosynthesis I (early cobalt insertion)	Biosynthesis	78.110 ± 5.675	83.290 ± 5.661	6.632	0.000 (0.000-49.405)	0.000 (0.000-61.110)	146868	0.422744	0.505076
	glycerol degradation to butanol	Biosynthesis	348.562 ± 13.353	360.921 ± 13.966	3.546	178.675 (60.743-423.928)	206.177 (63.177-440.510)	398746	0.425319	0.506256
	peptidoglycan biosynthesis IV (Enterococcus faecium)	Biosynthesis	1757.722 ± 22.017	1785.694 ± 22.457	1.591	1650.999 (1173.917-2252.778)	1645.871 (1194.012-2231.651)	401103	0.446285	0.527278
	preQ0 biosynthesis	Biosynthesis	4354.229 ± 25.470	4334.218 ± 24.119	-0.46	4278.950 (3737.042-4941.382)	4280.713 (3740.234-4859.230)	420373	0.489122	0.57364
	ADP-L-glycero-&beta;-D-manno-heptose biosynthesis	Biosynthesis	982.021 ± 14.655	989.015 ± 14.903	0.712	926.539 (601.917-1265.849)	911.412 (615.023-1252.832)	402704	0.521607	0.607272
	palmitate biosynthesis II (bacteria and plants)	Biosynthesis	3526.903 ± 55.810	3566.918 ± 53.237	1.135	3522.075 (2128.892-4754.666)	3545.205 (2318.234-4723.256)	397746	0.525404	0.609469
	L-tryptophan biosynthesis	Biosynthesis	6367.750 ± 26.657	6346.723 ± 25.620	-0.33	6349.742 (5710.933-6992.567)	6336.016 (5733.702-6963.383)	419360	0.538355	0.619983
	GDP-D-glycero-&alpha;-D-manno-heptose biosynthesis	Biosynthesis	885.118 ± 10.328	884.306 ± 11.095	-0.092	851.713 (627.040-1091.127)	836.803 (615.938-1110.396)	418427	0.5858	0.66266
	biotin biosynthesis II	Biosynthesis	246.409 ± 10.621	256.803 ± 10.683	4.218	76.811 (7.187-346.407)	82.681 (5.995-372.792)	353885	0.593198	0.666303
	UDP-2,3-diacetamido-2,3-dideoxy-&alpha;-D-mannuronate biosynthesis	Biosynthesis	122.920 ± 3.465	119.871 ± 3.265	-2.481	86.558 (43.862-161.422)	88.821 (44.636-156.296)	415983	0.611943	0.684946
	mycolate biosynthesis	Biosynthesis	4911.610 ± 61.723	4907.469 ± 59.110	-0.084	4554.622 (3388.169-6030.391)	4525.069 (3396.763-6132.482)	406878	0.744383	0.810438
	ppGpp biosynthesis	Biosynthesis	280.471 ± 15.102	293.524 ± 15.763	4.654	63.999 (7.882-288.994)	73.421 (10.094-299.460)	383445	0.804854	0.864473
	colanic acid building blocks biosynthesis	Biosynthesis	4389.457 ± 23.914	4393.686 ± 23.692	0.096	4368.725 (3829.760-4943.055)	4379.780 (3829.441-4993.801)	413936	0.836629	0.89322
	superpathway of fatty acid biosynthesis initiation (E. coli)	Biosynthesis	3997.080 ± 54.721	3982.244 ± 52.474	-0.371	3675.528 (2609.381-4939.469)	3638.514 (2616.827-5013.902)	408477	0.837219	0.89322
	superpathway of heme biosynthesis from uroporphyrinogen-III	Biosynthesis	626.731 ± 12.130	624.552 ± 12.507	-0.348	554.823 (301.073-862.176)	545.646 (308.001-816.187)	413613	0.855704	0.906876
	(5Z)-dodec-5-enoate biosynthesis	Biosynthesis	4463.321 ± 58.568	4442.607 ± 55.863	-0.464	4122.395 (3007.560-5474.472)	4106.665 (3002.452-5599.167)	409334	0.888016	0.926877
	peptidoglycan maturation (meso-diaminopimelate containing)	Biosynthesis	4828.304 ± 31.935	4823.905 ± 31.563	-0.091	4679.902 (4078.105-5506.472)	4720.199 (4028.719-5475.620)	413065	0.888254	0.926877
	palmitoleate biosynthesis I (from (5Z)-dodec-5-enoate)	Biosynthesis	4545.708 ± 60.196	4524.804 ± 57.408	-0.46	4202.452 (3037.956-5585.995)	4176.109 (3041.356-5712.249)	409355	0.889268	0.926877
	oleate biosynthesis IV (anaerobic)	Biosynthesis	4876.761 ± 61.033	4857.668 ± 58.322	-0.392	4544.391 (3355.950-5976.279)	4512.653 (3360.436-6067.208)	409691	0.909326	0.938361
	superpathway of menaquinol-8 biosynthesis II	Biosynthesis	989.587 ± 17.947	983.953 ± 16.852	-0.569	922.948 (490.703-1383.363)	919.614 (526.855-1384.967)	410095	0.912266	0.938361
	heme biosynthesis I (aerobic)	Biosynthesis	587.327 ± 11.752	589.391 ± 12.150	0.351	514.456 (256.297-818.014)	510.977 (263.318-811.624)	410123	0.935198	0.953126
	stearate biosynthesis II (bacteria and plants)	Biosynthesis	4623.016 ± 62.634	4595.019 ± 59.561	-0.606	4269.540 (3038.039-5678.364)	4210.640 (3069.232-5821.954)	410307	0.946241	0.961308
	1,4-dihydroxy-6-naphthoate biosynthesis II	Biosynthesis	458.802 ± 11.013	446.426 ± 9.550	-2.698	375.000 (183.655-612.500)	378.028 (198.750-617.000)	408424	0.986941	0.992762
	superpathay of heme biosynthesis from glutamate	Biosynthesis	1001.733 ± 16.139	1006.045 ± 16.530	0.43	959.835 (553.772-1366.849)	958.163 (553.470-1344.785)	411029	0.98965	0.992762
	D-galactarate degradation I	Degradation/Utilization/Assimilation	124.052 ± 6.378	156.551 ± 7.993	26.198	32.470 (5.959-131.705)	53.976 (10.295-168.375)	314518	3.33886e-08	3.55032e-06
	D-glucarate degradation I	Degradation/Utilization/Assimilation	128.592 ± 6.078	162.314 ± 7.790	26.224	47.951 (12.929-147.611)	60.353 (19.034-182.730)	338100	8.63331e-07	2.11848e-05
	reductive acetyl coenzyme A pathway	Degradation/Utilization/Assimilation	1098.701 ± 20.803	998.484 ± 18.959	-9.121	978.031 (536.068-1508.034)	856.890 (491.737-1375.551)	471656	3.05335e-06	4.23486e-05
	chondroitin sulfate degradation I (bacterial)	Degradation/Utilization/Assimilation	967.943 ± 20.242	1065.414 ± 21.237	10.07	814.546 (434.581-1332.602)	915.569 (532.668-1434.598)	349700	4.31452e-06	5.29358e-05
	Calvin-Benson-Bassham cycle	Degradation/Utilization/Assimilation	8951.064 ± 26.263	8835.357 ± 26.051	-1.293	8943.875 (8294.342-9587.591)	8845.793 (8221.115-9455.369)	470611	7.43592e-06	8.47163e-05
	sulfoglycolysis	Degradation/Utilization/Assimilation	48.625 ± 3.415	62.438 ± 4.259	28.406	4.071 (0.000-27.817)	7.339 (0.000-50.297)	271432	1.17992e-05	0.000121417
	glucose and glucose-1-phosphate degradation	Degradation/Utilization/Assimilation	208.135 ± 10.011	251.577 ± 12.015	20.872	67.208 (19.035-225.717)	93.947 (28.188-285.387)	353370	1.57067e-05	0.000143155
	allantoin degradation IV (anaerobic)	Degradation/Utilization/Assimilation	64.454 ± 3.896	77.198 ± 4.180	19.772	14.264 (2.728-54.953)	19.986 (3.933-72.494)	326436	2.38801e-05	0.000200467
	L-arginine degradation II (AST pathway)	Degradation/Utilization/Assimilation	73.933 ± 5.891	96.058 ± 8.402	29.927	4.500 (0.000-38.997)	7.750 (0.000-58.800)	284951	5.48045e-05	0.000388503
	urate biosynthesis/inosine 5'-phosphate degradation	Degradation/Utilization/Assimilation	7295.384 ± 30.129	7160.184 ± 29.510	-1.853	7338.437 (6598.006-8057.679)	7217.550 (6429.339-7933.131)	462347	0.000114545	0.000664361
	superpathway of hexitol degradation (bacteria)	Degradation/Utilization/Assimilation	691.445 ± 18.569	755.989 ± 19.486	9.335	480.196 (238.705-899.178)	554.686 (291.559-973.150)	360329	0.000124584	0.000697234
	superpathway of ornithine degradation	Degradation/Utilization/Assimilation	99.052 ± 7.269	127.565 ± 9.280	28.786	0.998 (0.000-46.982)	1.998 (0.000-84.468)	192110	0.000150886	0.000802209
	superpathway of glycerol degradation to 1,3-propanediol	Degradation/Utilization/Assimilation	63.191 ± 3.935	74.311 ± 5.275	17.598	27.736 (9.923-62.258)	33.344 (12.824-77.562)	349198	0.000285716	0.00147005
	superpathway of L-arginine, putrescine, and 4-aminobutanoate degradation	Degradation/Utilization/Assimilation	79.897 ± 6.534	106.705 ± 8.679	33.553	1.277 (0.000-31.918)	3.384 (0.000-57.511)	199452	0.000344846	0.0016924
	superpathway of L-arginine and L-ornithine degradation	Degradation/Utilization/Assimilation	79.897 ± 6.534	106.705 ± 8.679	33.553	1.277 (0.000-31.918)	3.384 (0.000-57.511)	199452	0.000344846	0.0016924
	superpathway of methylglyoxal degradation	Degradation/Utilization/Assimilation	65.322 ± 4.390	80.805 ± 4.899	23.704	5.001 (0.000-41.824)	10.491 (0.000-66.075)	251962	0.000371994	0.00177114
	superpathway of L-threonine metabolism	Degradation/Utilization/Assimilation	74.884 ± 7.111	100.871 ± 9.347	34.703	2.150 (0.000-36.248)	4.318 (0.000-47.093)	198284	0.000441619	0.00204169
	ketogluconate metabolism	Degradation/Utilization/Assimilation	66.641 ± 4.609	77.845 ± 5.092	16.812	5.979 (0.000-41.795)	10.766 (0.000-66.985)	277307	0.000730814	0.00328352
	fucose degradation	Degradation/Utilization/Assimilation	659.698 ± 12.806	702.844 ± 13.215	6.54	540.036 (351.762-828.044)	581.270 (381.825-900.282)	367070	0.000873155	0.00371382
	protocatechuate degradation II (ortho-cleavage pathway)	Degradation/Utilization/Assimilation	83.176 ± 6.162	72.575 ± 6.707	-12.745	0.000 (0.000-49.914)	0.000 (0.000-29.410)	196277	0.000904121	0.00379493
	catechol degradation I (meta-cleavage pathway)	Degradation/Utilization/Assimilation	17.348 ± 1.409	20.380 ± 1.499	17.48	1.248 (0.000-11.692)	1.987 (0.000-16.153)	232980	0.00112954	0.00434123
	incomplete reductive TCA cycle	Degradation/Utilization/Assimilation	7830.819 ± 54.737	7707.507 ± 53.482	-1.575	7686.659 (6439.273-8977.216)	7548.206 (6357.803-8812.365)	452757	0.00172318	0.00631834
	superpathway of phenylethylamine degradation	Degradation/Utilization/Assimilation	50.673 ± 4.636	70.257 ± 6.688	38.648	0.000 (0.000-17.274)	0.951 (0.000-27.280)	182946	0.00217862	0.00750279
	phenylacetate degradation I (aerobic)	Degradation/Utilization/Assimilation	55.071 ± 4.928	76.093 ± 7.046	38.173	0.000 (0.000-19.640)	1.183 (0.000-31.559)	185349	0.00249018	0.00836176
	2-methylcitrate cycle I	Degradation/Utilization/Assimilation	46.005 ± 3.108	54.615 ± 3.427	18.715	4.391 (0.000-29.557)	7.068 (0.000-45.655)	271684	0.00271558	0.00893061
	L-histidine degradation II	Degradation/Utilization/Assimilation	96.837 ± 6.975	85.279 ± 7.062	-11.936	0.000 (0.000-64.912)	0.000 (0.000-44.376)	217948	0.00395622	0.0124954
	3-phenylpropanoate and 3-(3-hydroxyphenyl)propanoate degradation to 2-oxopent-4-enoate	Degradation/Utilization/Assimilation	36.050 ± 3.228	44.364 ± 4.285	23.064	0.731 (0.000-11.989)	1.303 (0.000-20.654)	206541	0.00429254	0.0131665
	cinnamate and 3-hydroxycinnamate degradation to 2-oxopent-4-enoate	Degradation/Utilization/Assimilation	36.050 ± 3.228	44.364 ± 4.285	23.064	0.731 (0.000-11.989)	1.303 (0.000-20.654)	206541	0.00429254	0.0131665
	arginine, ornithine and proline interconversion	Degradation/Utilization/Assimilation	881.378 ± 10.093	848.856 ± 9.703	-3.69	848.332 (628.847-1102.124)	803.767 (606.731-1034.622)	448652	0.00473402	0.0143824
	aromatic biogenic amine degradation (bacteria)	Degradation/Utilization/Assimilation	61.033 ± 4.056	57.683 ± 5.084	-5.49	7.983 (1.489-40.836)	8.116 (1.331-29.577)	400774	0.00543684	0.0160588
	3-phenylpropanoate and 3-(3-hydroxyphenyl)propanoate degradation	Degradation/Utilization/Assimilation	61.721 ± 5.064	74.102 ± 6.188	20.06	1.398 (0.000-24.758)	2.618 (0.000-40.715)	207473	0.00600456	0.0169509
	glycine betaine degradation I	Degradation/Utilization/Assimilation	65.241 ± 6.175	61.677 ± 7.644	-5.462	0.000 (0.000-2.468)	0.000 (0.000-0.000)	70368	0.00620929	0.0173751
	allantoin degradation to glyoxylate III	Degradation/Utilization/Assimilation	171.366 ± 5.322	181.799 ± 5.196	6.088	106.363 (48.543-224.636)	122.481 (60.426-235.877)	375543	0.00715724	0.0191862
	L-tyrosine degradation I	Degradation/Utilization/Assimilation	63.337 ± 4.154	54.279 ± 3.849	-14.301	0.000 (0.000-49.027)	0.000 (0.000-38.288)	205495	0.00760235	0.0197167
	4-hydroxyphenylacetate degradation	Degradation/Utilization/Assimilation	46.330 ± 4.290	62.073 ± 6.092	33.98	0.000 (0.000-14.535)	0.311 (0.000-25.446)	179194	0.00817629	0.0208659
	adenosine nucleotides degradation IV	Degradation/Utilization/Assimilation	6.453 ± 0.852	7.919 ± 0.932	22.725	0.000 (0.000-2.966)	0.000 (0.000-4.900)	81527.5	0.0108398	0.0268054
	superpathway of glycol metabolism and degradation	Degradation/Utilization/Assimilation	279.001 ± 9.895	308.295 ± 10.721	10.499	138.343 (23.997-409.098)	179.885 (38.817-428.359)	370168	0.0121656	0.0291791
	myo-inositol degradation I	Degradation/Utilization/Assimilation	102.724 ± 4.606	100.498 ± 5.513	-2.167	52.278 (23.553-111.508)	48.968 (21.453-103.602)	440672	0.0152164	0.0349211
	nitrate reduction I (denitrification)	Degradation/Utilization/Assimilation	30.712 ± 2.648	27.055 ± 2.827	-11.906	0.000 (0.000-11.191)	0.000 (0.000-8.950)	142886	0.0156552	0.0356714
	L-lysine fermentation to acetate and butanoate	Degradation/Utilization/Assimilation	462.878 ± 16.451	442.209 ± 16.202	-4.465	267.028 (123.590-531.940)	239.134 (123.964-497.225)	434910	0.018874	0.0418112
	sulfate reduction I (assimilatory)	Degradation/Utilization/Assimilation	1095.034 ± 17.650	1153.784 ± 18.987	5.365	966.345 (684.416-1369.209)	993.834 (703.191-1418.333)	380556	0.020814	0.0437694
	superpathway of glucose and xylose degradation	Degradation/Utilization/Assimilation	3934.431 ± 34.938	4038.688 ± 34.121	2.65	3887.940 (3100.320-4692.073)	3992.347 (3254.560-4807.773)	380566	0.0208556	0.0437694
	superpathway of sulfate assimilation and cysteine biosynthesis	Degradation/Utilization/Assimilation	2053.620 ± 27.917	2138.240 ± 28.948	4.12	1875.740 (1388.165-2566.037)	1930.710 (1428.966-2635.658)	381354	0.0243758	0.0475813
	superpathway of pyrimidine deoxyribonucleosides degradation	Degradation/Utilization/Assimilation	3960.141 ± 24.894	4020.679 ± 23.465	1.529	3904.422 (3344.309-4510.293)	3945.747 (3417.051-4560.758)	382336	0.0294739	0.0559654
	reductive TCA cycle I	Degradation/Utilization/Assimilation	1166.971 ± 27.645	1228.996 ± 28.146	5.315	910.535 (404.781-1665.618)	969.080 (447.417-1712.055)	382821	0.0323137	0.0603724
	2-methylcitrate cycle II	Degradation/Utilization/Assimilation	53.723 ± 3.404	60.677 ± 3.580	12.944	7.452 (0.000-42.357)	9.678 (0.000-56.555)	310144	0.0369953	0.0674371
	sucrose degradation IV (sucrose phosphorylase)	Degradation/Utilization/Assimilation	1207.287 ± 18.723	1240.302 ± 17.818	2.735	1088.943 (698.120-1581.933)	1123.904 (765.423-1615.312)	386531	0.0627881	0.103244
	glutaryl-CoA degradation	Degradation/Utilization/Assimilation	377.225 ± 11.075	409.122 ± 11.883	8.456	248.539 (79.562-556.437)	279.439 (94.486-561.443)	384928	0.0653101	0.106295
	urea cycle	Degradation/Utilization/Assimilation	1712.607 ± 32.693	1775.144 ± 31.804	3.652	1423.802 (793.975-2407.060)	1532.618 (879.459-2527.203)	386885	0.0666556	0.107935
	fatty acid &beta;-oxidation I	Degradation/Utilization/Assimilation	421.918 ± 17.827	465.340 ± 20.151	10.292	155.135 (35.889-536.730)	196.889 (45.315-536.451)	380015	0.0719112	0.114043
	superpathway of sulfur oxidation (Acidianus ambivalens)	Degradation/Utilization/Assimilation	868.998 ± 17.642	823.814 ± 16.246	-5.2	710.500 (431.085-1118.085)	700.500 (416.250-1059.915)	433707	0.0896215	0.13946
	L-rhamnose degradation I	Degradation/Utilization/Assimilation	2568.768 ± 29.719	2630.815 ± 28.970	2.415	2396.451 (1769.166-3172.144)	2451.576 (1866.859-3192.819)	389038	0.0946026	0.145789
	nitrate reduction VI (assimilatory)	Degradation/Utilization/Assimilation	572.339 ± 10.990	590.965 ± 11.150	3.254	483.864 (308.262-733.228)	501.659 (323.864-748.967)	389676	0.104486	0.158479
	purine nucleotides degradation II (aerobic)	Degradation/Utilization/Assimilation	2474.551 ± 22.995	2437.000 ± 23.648	-1.517	2392.497 (1915.208-2955.845)	2377.115 (1810.137-2975.957)	427809	0.210369	0.285564
	L-glutamate degradation V (via hydroxyglutarate)	Degradation/Utilization/Assimilation	268.164 ± 6.890	288.363 ± 8.246	7.532	222.596 (94.798-374.437)	233.114 (91.723-386.712)	392366	0.217501	0.292754
	starch degradation V	Degradation/Utilization/Assimilation	8983.324 ± 42.371	8933.337 ± 41.171	-0.556	8795.445 (7907.191-9842.649)	8715.135 (7901.487-9772.992)	426877	0.237103	0.316469
	3-phenylpropanoate degradation	Degradation/Utilization/Assimilation	9.883 ± 1.186	7.949 ± 0.909	-19.571	0.000 (0.000-2.897)	0.000 (0.000-1.993)	107548	0.255538	0.334084
	D-fructuronate degradation	Degradation/Utilization/Assimilation	4821.416 ± 41.005	4874.739 ± 38.431	1.106	4636.965 (3687.552-5845.273)	4803.126 (3889.484-5753.166)	397018	0.284742	0.367744
	lactose and galactose degradation I	Degradation/Utilization/Assimilation	48.760 ± 2.217	52.351 ± 3.041	7.366	23.322 (1.924-63.605)	23.174 (3.009-63.308)	323424	0.310597	0.394742
	anhydromuropeptides recycling	Degradation/Utilization/Assimilation	4997.700 ± 40.410	4993.145 ± 37.715	-0.091	5146.796 (4117.150-5977.326)	5007.380 (4103.834-5934.910)	424452	0.317622	0.402069
	galactose degradation I (Leloir pathway)	Degradation/Utilization/Assimilation	5485.309 ± 28.996	5454.533 ± 27.409	-0.561	5491.402 (4797.120-6152.054)	5411.770 (4772.879-6110.785)	424051	0.332489	0.419226
	L-leucine degradation I	Degradation/Utilization/Assimilation	141.032 ± 7.952	131.937 ± 7.358	-6.449	9.121 (0.000-147.811)	11.225 (0.000-153.826)	236858	0.370688	0.456562
	superpathway of N-acetylneuraminate degradation	Degradation/Utilization/Assimilation	3244.349 ± 27.634	3285.501 ± 26.152	1.268	3290.749 (2650.676-3883.757)	3278.353 (2719.431-3907.728)	399421	0.37428	0.459213
	purine ribonucleosides degradation	Degradation/Utilization/Assimilation	4050.703 ± 26.647	4033.517 ± 25.747	-0.424	3983.566 (3419.292-4655.072)	3968.830 (3364.412-4610.645)	422786	0.382281	0.467232
	superpathway of purine deoxyribonucleosides degradation	Degradation/Utilization/Assimilation	3851.163 ± 24.736	3879.902 ± 23.477	0.746	3763.740 (3249.992-4375.510)	3810.029 (3260.500-4396.005)	400025	0.399268	0.486132
	toluene degradation I (aerobic) (via o-cresol)	Degradation/Utilization/Assimilation	113.827 ± 6.295	124.665 ± 7.266	9.521	10.296 (0.000-122.559)	14.581 (0.000-128.959)	256096	0.409459	0.492896
	toluene degradation II (aerobic) (via 4-methylcatechol)	Degradation/Utilization/Assimilation	113.827 ± 6.295	124.665 ± 7.266	9.521	10.296 (0.000-122.559)	14.581 (0.000-128.959)	256096	0.409459	0.492896
	formaldehyde oxidation I	Degradation/Utilization/Assimilation	457.995 ± 11.519	477.320 ± 12.690	4.22	333.185 (167.969-633.191)	345.221 (154.612-657.661)	400423	0.416269	0.49921
	methylphosphonate degradation I	Degradation/Utilization/Assimilation	436.164 ± 11.863	466.144 ± 13.412	6.874	312.543 (152.244-583.179)	312.559 (148.578-607.408)	400791	0.432363	0.512728
	4-deoxy-L-threo-hex-4-enopyranuronate degradation	Degradation/Utilization/Assimilation	4123.267 ± 40.019	4160.491 ± 37.067	0.903	3919.575 (3038.401-5022.335)	4071.176 (3188.718-4956.281)	401192	0.450303	0.530061
	formaldehyde assimilation II (RuMP Cycle)	Degradation/Utilization/Assimilation	716.166 ± 20.145	739.276 ± 21.678	3.227	473.064 (234.272-959.064)	491.884 (211.356-989.001)	403191	0.545751	0.626239
	glycogen degradation I (bacterial)	Degradation/Utilization/Assimilation	8717.785 ± 36.043	8704.762 ± 33.686	-0.149	8713.499 (7921.064-9520.388)	8670.564 (7984.145-9439.058)	418480	0.583054	0.661901
	D-galacturonate degradation I	Degradation/Utilization/Assimilation	3715.674 ± 29.272	3711.246 ± 28.193	-0.119	3588.120 (2926.551-4336.820)	3596.780 (2971.628-4310.324)	417747	0.621557	0.693275
	purine nucleobases degradation I (anaerobic)	Degradation/Utilization/Assimilation	1562.204 ± 16.536	1575.108 ± 16.779	0.826	1461.054 (1175.215-1854.060)	1493.237 (1148.465-1884.716)	405006	0.640324	0.711719
	adenosine nucleotides degradation II	Degradation/Utilization/Assimilation	1991.035 ± 25.874	1976.146 ± 27.026	-0.748	1835.682 (1332.827-2476.978)	1791.531 (1261.598-2529.051)	417126	0.655015	0.72552
	superpathway of taurine degradation	Degradation/Utilization/Assimilation	19.025 ± 1.627	19.545 ± 1.484	2.736	0.000 (0.000-4.573)	0.000 (0.000-4.470)	74065	0.702151	0.767076
	superpathway of &beta;-D-glucuronide and D-glucuronate degradation	Degradation/Utilization/Assimilation	2060.618 ± 22.589	2059.201 ± 22.536	-0.069	1946.931 (1489.454-2521.661)	1941.294 (1492.673-2463.100)	415324	0.755881	0.817376
	formaldehyde assimilation I (serine pathway)	Degradation/Utilization/Assimilation	22.373 ± 1.824	25.786 ± 2.645	15.26	0.000 (0.000-13.740)	0.000 (0.000-12.465)	88708	0.787629	0.84883
	guanosine nucleotides degradation III	Degradation/Utilization/Assimilation	2323.283 ± 26.027	2326.779 ± 27.190	0.15	2162.456 (1667.316-2811.953)	2156.636 (1613.847-2869.842)	408537	0.840755	0.894003
	myo-, chiro- and scillo-inositol degradation	Degradation/Utilization/Assimilation	1045.589 ± 18.678	1051.968 ± 18.644	0.61	925.830 (543.870-1401.612)	941.290 (559.250-1412.635)	408876	0.860827	0.909285
	superpathway of sulfolactate degradation	Degradation/Utilization/Assimilation	43.232 ± 2.559	44.135 ± 2.932	2.088	0.000 (0.000-53.267)	0.000 (0.000-54.105)	97582	0.875053	0.921261
	superpathway of N-acetylglucosamine, N-acetylmannosamine and N-acetylneuraminate degradation	Degradation/Utilization/Assimilation	2181.830 ± 22.577	2183.755 ± 22.249	0.088	2090.232 (1625.295-2660.829)	2082.712 (1619.246-2600.224)	412664	0.912196	0.938361
	L-histidine degradation I	Degradation/Utilization/Assimilation	2639.676 ± 28.436	2648.066 ± 27.014	0.318	2499.914 (1895.431-3254.320)	2536.880 (1965.651-3271.191)	409853	0.919018	0.939637
	sucrose degradation III (sucrose invertase)	Degradation/Utilization/Assimilation	4381.992 ± 33.581	4380.277 ± 31.828	-0.039	4309.737 (3565.180-5055.697)	4253.075 (3632.607-5047.598)	412018	0.950925	0.963
	mannan degradation	Degradation/Utilization/Assimilation	2835.297 ± 28.170	2839.987 ± 26.286	0.165	2767.250 (2122.924-3438.817)	2774.641 (2211.227-3443.155)	411095	0.993621	0.993621
	acetylene degradation	Generation of Precursor Metabolites and Energy	4584.234 ± 33.131	4790.511 ± 31.496	4.5	4569.194 (3764.760-5381.496)	4806.165 (4027.982-5537.527)	339714	6.97655e-08	5.00913e-06
	TCA cycle VII (acetate-producers)	Generation of Precursor Metabolites and Energy	562.276 ± 20.059	643.770 ± 22.947	14.493	296.032 (73.525-783.780)	350.140 (93.589-941.835)	358553	0.000103047	0.000614032
	L-1,2-propanediol degradation	Generation of Precursor Metabolites and Energy	215.276 ± 14.813	283.004 ± 19.555	31.461	74.593 (24.740-179.972)	87.736 (31.625-246.147)	355682	0.000124285	0.000697234
	mixed acid fermentation	Generation of Precursor Metabolites and Energy	4732.269 ± 34.243	4858.787 ± 32.827	2.674	4774.369 (3916.881-5558.113)	4947.114 (4062.092-5630.906)	363492	0.000320227	0.00162147
	glycolysis III (from glucose)	Generation of Precursor Metabolites and Energy	9148.979 ± 30.904	9059.178 ± 30.331	-0.982	9221.255 (8411.912-9894.578)	9126.567 (8318.449-9821.806)	455017	0.000950901	0.00393945
	isopropanol biosynthesis	Generation of Precursor Metabolites and Energy	70.696 ± 5.209	60.764 ± 5.244	-14.048	3.999 (0.000-47.860)	2.000 (0.000-35.891)	250232	0.00218733	0.00750279
	Bifidobacterium shunt	Generation of Precursor Metabolites and Energy	1615.329 ± 21.730	1548.635 ± 22.461	-4.129	1520.295 (1056.089-2005.682)	1390.494 (967.622-1989.779)	447211	0.00660935	0.0181757
	superpathway of glycolysis, pyruvate dehydrogenase, TCA, and glyoxylate bypass	Generation of Precursor Metabolites and Energy	495.783 ± 21.704	554.640 ± 23.606	11.872	137.612 (17.090-660.820)	201.650 (24.643-716.500)	343541	0.00758541	0.0197167
	superpathway of glyoxylate bypass and TCA	Generation of Precursor Metabolites and Energy	305.262 ± 14.829	345.556 ± 16.529	13.2	69.809 (8.581-367.770)	105.259 (12.348-419.793)	343600	0.00769438	0.0197944
	hexitol fermentation to lactate, formate, ethanol and acetate	Generation of Precursor Metabolites and Energy	599.864 ± 17.398	627.160 ± 18.024	4.55	409.332 (210.898-760.967)	434.586 (233.669-811.352)	378920	0.0149027	0.0344491
	pyruvate fermentation to acetone	Generation of Precursor Metabolites and Energy	2389.890 ± 35.440	2311.089 ± 36.765	-3.297	2215.571 (1427.703-3113.937)	2080.476 (1297.271-3088.852)	442498	0.0182531	0.0412961
	methanogenesis from acetate	Generation of Precursor Metabolites and Energy	349.592 ± 11.762	370.588 ± 11.600	6.006	199.094 (77.523-448.319)	238.734 (93.594-495.150)	373985	0.0186404	0.0417764
	pentose phosphate pathway (non-oxidative branch)	Generation of Precursor Metabolites and Energy	11314.279 ± 36.955	11230.348 ± 37.906	-0.742	11369.682 (10447.282-12192.961)	11268.843 (10342.838-12100.946)	442034	0.0200481	0.0437694
	glycolysis V (Pyrococcus)	Generation of Precursor Metabolites and Energy	45.415 ± 2.591	56.940 ± 3.411	25.378	16.794 (3.324-42.380)	17.477 (3.224-52.190)	338587	0.0225097	0.0454468
	glyoxylate cycle	Generation of Precursor Metabolites and Energy	397.269 ± 14.943	435.459 ± 16.201	9.613	158.229 (26.249-562.481)	211.885 (42.050-584.453)	373983	0.0237535	0.0470644
	TCA cycle IV (2-oxoglutarate decarboxylase)	Generation of Precursor Metabolites and Energy	631.677 ± 28.106	701.650 ± 29.891	11.077	143.418 (13.793-843.748)	203.237 (14.959-914.949)	334367	0.0241887	0.0475813
	heterolactic fermentation	Generation of Precursor Metabolites and Energy	1213.704 ± 14.776	1177.593 ± 15.469	-2.975	1165.237 (842.810-1507.701)	1083.048 (767.890-1487.427)	440010	0.0297961	0.0562424
	4-aminobutanoate degradation V	Generation of Precursor Metabolites and Energy	333.653 ± 7.753	356.897 ± 8.600	6.967	255.160 (141.927-433.228)	260.861 (152.436-479.165)	383763	0.0385029	0.0696987
	pyruvate fermentation to acetate and lactate II	Generation of Precursor Metabolites and Energy	7967.807 ± 27.792	7918.447 ± 26.501	-0.619	8047.547 (7280.910-8698.433)	7943.876 (7283.044-8631.737)	437127	0.0505424	0.0848008
	pentose phosphate pathway	Generation of Precursor Metabolites and Energy	3407.526 ± 35.278	3490.158 ± 34.431	2.425	3312.227 (2510.405-4160.397)	3442.338 (2656.028-4243.430)	388255	0.0835125	0.130591
	glycolysis I (from glucose 6-phosphate)	Generation of Precursor Metabolites and Energy	7913.301 ± 39.141	7889.448 ± 38.917	-0.301	7938.183 (7056.494-8785.481)	7915.805 (7039.246-8794.402)	430993	0.135516	0.195609
	superpathway of Clostridium acetobutylicum acidogenic fermentation	Generation of Precursor Metabolites and Energy	894.109 ± 23.870	932.603 ± 23.590	4.305	588.879 (180.017-1486.296)	686.940 (214.255-1498.306)	390059	0.145732	0.208469
	pyruvate fermentation to butanoate	Generation of Precursor Metabolites and Energy	734.978 ± 20.188	766.110 ± 19.992	4.236	465.965 (140.791-1223.080)	546.853 (167.620-1225.138)	390343	0.151779	0.215254
	acetyl-CoA fermentation to butanoate II	Generation of Precursor Metabolites and Energy	1226.653 ± 22.260	1268.569 ± 23.221	3.417	1087.647 (614.700-1688.915)	1112.251 (636.498-1769.781)	392941	0.168442	0.234642
	aerobic respiration I (cytochrome c)	Generation of Precursor Metabolites and Energy	1339.296 ± 50.591	1321.131 ± 51.321	-1.356	546.092 (43.897-1973.639)	558.009 (43.912-1850.480)	383794	0.258997	0.337225
	pyruvate fermentation to isobutanol (engineered)	Generation of Precursor Metabolites and Energy	9332.984 ± 34.618	9364.990 ± 33.556	0.343	9358.157 (8490.313-10227.832)	9467.558 (8579.953-10177.014)	399297	0.369272	0.456562
	succinate fermentation to butanoate	Generation of Precursor Metabolites and Energy	383.463 ± 9.350	375.059 ± 8.967	-2.192	290.103 (172.187-481.081)	281.733 (175.599-469.590)	422233	0.405413	0.491737
	ethylmalonyl-CoA pathway	Generation of Precursor Metabolites and Energy	98.279 ± 6.283	95.927 ± 6.167	-2.393	0.000 (0.000-77.246)	0.000 (0.000-80.854)	159183	0.516012	0.602959
	homolactic fermentation	Generation of Precursor Metabolites and Energy	6620.138 ± 32.418	6629.510 ± 32.595	0.142	6680.131 (5931.522-7395.927)	6703.187 (5932.212-7404.517)	419378	0.537459	0.619983
	glycolysis II (from fructose 6-phosphate)	Generation of Precursor Metabolites and Energy	6884.295 ± 44.775	6899.755 ± 44.501	0.225	6944.955 (5865.160-7886.415)	6880.005 (5895.010-7950.436)	419167	0.54801	0.626577
	TCA cycle VI (obligate autotrophs)	Generation of Precursor Metabolites and Energy	3712.112 ± 45.370	3759.084 ± 45.149	1.265	3570.470 (2525.663-4838.100)	3634.142 (2514.148-4799.172)	403846	0.579074	0.659731
	methylaspartate cycle	Generation of Precursor Metabolites and Energy	27.579 ± 3.234	31.154 ± 2.943	12.964	0.000 (0.000-2.532)	0.000 (0.000-6.265)	73331	0.663798	0.732704
	TCA cycle I (prokaryotic)	Generation of Precursor Metabolites and Energy	4642.365 ± 36.743	4684.343 ± 36.579	0.904	4631.702 (3809.906-5473.988)	4643.947 (3821.392-5510.780)	405742	0.680534	0.748587
	TCA cycle VIII (helicobacter)	Generation of Precursor Metabolites and Energy	703.514 ± 23.749	741.977 ± 27.613	5.467	407.126 (172.956-914.582)	410.701 (156.185-922.117)	416488	0.690124	0.756528
	TCA cycle V (2-oxoglutarate:ferredoxin oxidoreductase)	Generation of Precursor Metabolites and Energy	5883.813 ± 35.891	5904.202 ± 35.787	0.347	5821.105 (5056.678-6684.631)	5832.019 (5058.275-6650.954)	415390	0.7521	0.816054
	superpathway of glycolysis and Entner-Doudoroff	Generation of Precursor Metabolites and Energy	2852.009 ± 31.470	2867.839 ± 30.563	0.555	2838.839 (2058.120-3572.909)	2838.735 (2117.167-3575.001)	409783	0.914829	0.938361
	pyruvate fermentation to propanoate I	Generation of Precursor Metabolites and Energy	4478.905 ± 48.249	4504.929 ± 46.666	0.581	4388.504 (3226.620-5592.129)	4419.135 (3325.169-5534.680)	411447	0.985257	0.992762
	queuosine biosynthesis	Macromolecule Modification	5272.785 ± 29.082	5149.251 ± 27.526	-2.343	5216.725 (4561.562-5921.013)	5112.589 (4491.976-5732.006)	466855	2.69849e-05	0.000215205
	superpathway of D-glucarate and D-galactarate degradation	NA	124.052 ± 6.378	156.551 ± 7.993	26.198	32.470 (5.959-131.705)	53.976 (10.295-168.375)	314518	3.33886e-08	3.55032e-06
	superpathway of fucose and rhamnose degradation	NA	1006.370 ± 14.806	1076.675 ± 15.688	6.986	892.323 (622.638-1262.058)	960.861 (688.185-1355.293)	356510	3.70788e-05	0.000269439
	superpathway of chorismate metabolism	NA	304.408 ± 14.319	361.649 ± 16.172	18.804	91.478 (0.000-332.704)	133.414 (0.824-442.595)	282344	9.65072e-05	0.000603643
	superpathway of S-adenosyl-L-methionine biosynthesis	NA	3163.517 ± 32.927	3079.333 ± 32.063	-2.661	3130.597 (2330.611-3898.543)	2981.021 (2262.308-3744.975)	448610	0.00478103	0.0143882
	superpathway of histidine, purine, and pyrimidine biosynthesis	NA	4151.685 ± 32.566	4129.456 ± 29.778	-0.535	4202.403 (3425.300-4973.642)	4125.673 (3444.240-4858.059)	429262	0.173153	0.239116
	aspartate superpathway	NA	2778.535 ± 32.203	2800.594 ± 31.273	0.794	2841.324 (1972.556-3576.215)	2841.465 (2025.905-3530.835)	404115	0.593031	0.666303
	superpathway of hexuronide and hexuronate degradation	NA	2187.621 ± 21.886	2191.820 ± 21.773	0.192	2093.405 (1613.661-2628.406)	2073.186 (1636.275-2607.825)	413002	0.89201	0.926877

## Sheet: Table S4
	Table S4: Contribution of phenotypic traits to changes in the gut microbiome
	Correlations between different phenotypic factors at SHIP-2 and global changes in the gut microbiome based on a) Bray-Curtis dissimilarity, b) Jaccard distance and c) Euclidean distance from SHIP-2 to SHIP-3. q-values were calculated using the method of Benjamini & Hochberg. Regression analysis was performed for factors which were identified as being significantly correlated to gut microbiota cha…
a)		Correlation analysis			Regression analysis
	Phenotypic factor	Correlation (r)	p-value	q-value	Covariables	Estimate	p-value
	Fatty liver disease	0.0971082	0.000524021	0.00602624	age, sex, sequencing batch	0.0221542	0.00733717
	Diabetes mellitus	0.0926747	0.00089748	0.00688068	age, sex, sequencing batch, metformin, DPP-4 inh.	0.0232724	0.0216401
	Glycemic control (HbA1c)	0.0839152	0.00286204	0.0138133	age, sex, sequencing batch, metformin, DPP-4 inh.	0.0196744	0.03469
	BMI	0.0635381	0.0232786	0.066926
	Arterial hypertension	0.037299	0.182161	0.418969
	Cardiac function (NT-proBNP)	0.0288383	0.314197	0.544921
	Dyslipidemia	0.0281221	0.314732	0.544921
	Age	0.0199698	0.474985	0.72831
	LDL/HDL ratio	0.0165643	0.554884	0.797645
	Renal function (eGFR)	0.0123687	0.658791	0.891306
	Alcohol	0.00730743	0.798013	0.999918
	Proton-pump inhibitor usage	0.0051539	0.853734	0.999918
	Carotid intima-media thickness	-2.91807e-06	0.999918	0.999918
	Smoking	-0.000890528	0.975059	0.999918
	Hypothyroidism	-0.00240057	0.931678	0.999918
	Manifest atherosclerotic disease	-0.00321343	0.908489	0.999918
	Thyroid function (TSH)	-0.0272822	0.331691	0.544921
	Balanced diet (Food frequency score)	-0.0328243	0.240217	0.502272
	Number of household members	-0.0488167	0.0832498	0.212749
	Exocrine pancreatic function (Pancreatic elastase)	-0.0704288	0.0118875	0.0390588	age, sex, sequencing batch	-0.0170871	0.0401673
	Female sex	-0.0805632	0.00389619	0.0149354	age, sequencing batch	-0.0238669	0.00313064
	Household net income	-0.0834359	0.00300289	0.0138133	age, sex, sequencing batch	-0.024453	0.00339361
	Species richness (N0)	-0.129266	3.64531e-06	8.3842e-05	age, sex, sequencing batch	-0.035359	1.67904e-05
b)		Correlation analysis			Regression analysis
	Phenotypic factor	Correlation (r)	p-value	q-value	Covariables	Estimate	p-value
	BMI	0.0893858	0.00139841	0.0160817	age, sex, sequencing batch	0.00955369	0.000824663
	Fatty liver disease	0.0816725	0.00355841	0.0204609	age, sex, sequencing batch	0.0077433	0.00597763
	Proton-pump inhibitor usage	0.0792921	0.00450061	0.0207028	age, sex, sequencing batch	0.00840191	0.00235354
	Dyslipidemia	0.0419811	0.133315	0.383281
	Renal function (eGFR)	0.0395658	0.157639	0.392114
	Hypothyroidism	0.0383642	0.170484	0.392114
	Diabetes mellitus	0.0309587	0.268195	0.560772
	Arterial hypertension	0.0212611	0.447075	0.685413
	Cardiac function (NT-proBNP)	0.0211341	0.460813	0.685413
	Glycemic control (HbA1c)	0.0188521	0.503596	0.685413
	LDL/HDL ratio	0.0169288	0.546205	0.697929
	Manifest atherosclerotic disease	0.0108726	0.69733	0.763743
	Exocrine pancreatic function (Pancreatic elastase)	0.00607296	0.828491	0.863694
	Thyroid function (TSH)	-0.0048258	0.863694	0.863694
	Age	-0.0113429	0.684927	0.763743
	Carotid intima-media thickness	-0.0143989	0.610181	0.73864
	Smoking	-0.0189155	0.50661	0.685413
	Alcohol	-0.0192255	0.500715	0.685413
	Female sex	-0.0269142	0.335599	0.643231
	Number of household members	-0.0433537	0.124024	0.383281
	Household net income	-0.058376	0.0380492	0.145855
	Balanced diet (Food frequency score)	-0.0836612	0.00271914	0.0204609	age, sex, sequencing batch	-0.0094721	0.00164189
	Species richness (N0)	-0.327566	2.85488e-33	6.56621e-32	age, sex, sequencing batch	-0.0320618	4.80561e-32
c)		Correlation analysis			Regression analysis
	Phenotypic factor	Correlation (r)	p-value	q-value	Covariables	Estimate	p-value
	Fatty liver disease	0.11779	2.5364e-05	0.000291686	age, sex, sequencing batch	0.00858124	0.000589645
	BMI	0.0898748	0.00131572	0.00756537	age, sex, sequencing batch	0.00770654	0.00239146
	Glycemic control (HbA1c)	0.053494	0.0575541	0.165468
	Diabetes mellitus	0.0512937	0.0664656	0.169857
	Arterial hypertension	0.0438963	0.116341	0.222988
	LDL/HDL ratio	0.0410028	0.143708	0.254253
	Renal function (eGFR)	0.0197794	0.480066	0.610467
	Alcohol	0.0190649	0.504299	0.610467
	Smoking	0.00690967	0.80833	0.838304
	Dyslipidemia	0.00570926	0.838304	0.838304
	Carotid intima-media thickness	-0.0113575	0.687594	0.753079
	Proton-pump inhibitor usage	-0.0149508	0.592773	0.681689
	Manifest atherosclerotic disease	-0.0282039	0.312948	0.4234
	Age	-0.0292092	0.296005	0.4234
	Number of household members	-0.0363937	0.196706	0.301616
	Cardiac function (NT-proBNP)	-0.038343	0.180771	0.296981
	Hypothyroidism	-0.0448748	0.10883	0.222988
	Thyroid function (TSH)	-0.044934	0.109758	0.222988
	Balanced diet (Food frequency score)	-0.0578626	0.0383134	0.125887
	Exocrine pancreatic function (Pancreatic elastase)	-0.0605194	0.0307079	0.117714
	Household net income	-0.0620325	0.0274896	0.117714
	Female sex	-0.104145	0.000187397	0.00143671	age, sequencing batch	-0.00903499	0.000217399
	Species richness (N0)	-0.20877	5.05842e-14	1.16344e-12	age, sex, sequencing batch	-0.0167784	1.03725e-11

## Sheet: Table S5
	Table S5: Contribution of microbial instability, fatty liver disease and diabetes mellitus to levels of facultative pathogenic bacteria and lipopolysaccharide biosynthesis capability
	The contribution to the increase of facultative pathogenic bacteria (∆abundance of Escherichia.Shigella, Enterobacteriaceae, and Citrobacter) and lipopolysaccharide biosynthesis (LPS) capability towards SHIP-3 of fatty liver disease and diabetes was determined using a linear regression model adjusting for the respective facultative pathogen baseline level, age, sex, sequencing batch and for diabe…
		Increase in facultative pathogenic bacteria
	Phenotypic factor	Covariables	Estimate	p-value
	Microbial instability (BC)	age, sex, sequencing batch	0.515284	0.0267453
	Fatty liver disease	age, sex, sequencing batch	0.375649	0.0383946
	Diabetes mellitus	age, sex, sequencing batch, metformin, DPP-4 inh.	0.725981	0.00701096
		Increase in LPS biosynthesis capability
	Phenotypic factor	Covariables	Estimate	p-value
	Microbial instability (BC)	age, sex, sequencing batch	35.2628	0.0131129
	Fatty liver disease	age, sex, sequencing batch	11.5955	0.298898
	Diabetes mellitus	age, sex, sequencing batch, metformin, DPP-4 inh.	39.2673	0.0205459

## Sheet: Table S6
	Table S6: Incident metabolic and cardiovascular disease at SHIP-3 and its association to fecal microbiota
	Associations between incident metabolic and cardiovascular diseases at SHIP-3 and fecal microbiota composition in the affected individuals at SHIP-2 (before the respective disease was present) and SHIP-3 (time point of disease incidence) were calculated performing permutational analysis of variance based on Bray-Curtis dissimilarity. DPP-4: dipeptidyl peptidase-4.
	Disease	Incident cases at SHIP-3 (number)	Covariables	SHIP-2		SHIP-3
				r²	p-value	r²	p-value
	Fatty liver disease	64	age, sex, sequencing batch	0.00263	0.009	0.00567	<0.001
	Hypertension	127	age, sex, sequencing batch	0.00251	0.053	0.00489	0.003
	Diabetes mellitus	54	age, sex, sequencing batch, metformin, DPP-4 inh.	0.00167	0.034	0.00220	0.008
	Dyslipidemia	103	age, sex, sequencing batch	0.00082	0.758	0.00114	0.444
	Hypothyroidism	60	age, sex, sequencing batch	0.00067	0.680	0.00074	0.560
	Manifest atherosclerotic disease	63	age, sex, sequencing batch	0.00073	0.472	0.00047	0.853

## Sheet: Table S7
	Table S7: Incident fatty liver disease at SHIP-3 and its association to fecal microbial genera at SHIP-3 and SHIP-2
	Associations between incident fatty liver disease at SHIP-3 with fecal microbiota in the affected individuals at SHIP-3 (incident disease) and SHIP-2 (before disease became apparent). Only genera with presence in at least 50 individuals with incident fatty liver disease and a mean abundance of at least 0.1% were included into the model. Included covariables in all linear regression models: Sequen…
		Genus associations at SHIP-3			Genus associations at SHIP-2
		Estimate	p-value	q-value	Estimate	p-value	q-value
	Bacteroides	-0.067758	0.607183	0.73368
	Alistipes	-0.283272	0.0331523	0.0961417
	Lachnospiraceae (f)	0.0317352	0.811487	0.90512
	Ruminococcaceae (f)	-0.457115	0.000614288	0.00593811	-0.177729	0.188921	0.226706
	Parabacteroides	0.138182	0.330376	0.479045
	Parasutterella	0.346734	0.0168972	0.0666525
	Subdoligranulum	-0.203776	0.154495	0.320024
	Faecalibacterium	-0.323321	0.0193602	0.0666525
	Firmicutes (p)	-0.314101	0.0206852	0.0666525
	Collinsella	0.400295	0.00660955	0.0383354	0.376653	0.0125344	0.0254316
	Roseburia	0.0973068	0.461634	0.608518
	Clostridium IV	-0.140575	0.299768	0.457541
	Odoribacter	-0.270045	0.0664483	0.159192
	Oscillibacter	-0.36997	0.00503826	0.0365274	-0.331493	0.0127158	0.0254316
	Clostridiales (o)	-0.556015	4.17219e-05	0.00120994	-0.0875283	0.52329	0.52329
	Ruminococcus	-0.110589	0.449826	0.608518
	Anaerotruncus	-0.0547253	0.719111	0.834168
	Ruminococcus2	0.152435	0.268304	0.457541
	Flavonifractor	0.15164	0.284896	0.457541
	Coprococcus	0.270552	0.0590939	0.155793
	Clostridium XlVa	0.481864	0.000528506	0.00593811	0.32022	0.02283	0.0342449
	Fusicatenibacter	-0.0142313	0.921084	0.95678
	Streptococcus	-0.0764688	0.599	0.73368
	Erysipelotrichaceae (f)	-0.156611	0.283264	0.457541
	Bilophila	-0.0142823	0.923788	0.95678
	Clostridium XlVb	0.426082	0.0081617	0.0394482	0.417135	0.00364429	0.0218657
	Pseudoflavonifractor	0.265435	0.071362	0.159192
	Blautia	0.156754	0.268787	0.457541
	Butyricicoccus	-0.00629471	0.963633	0.963633

## Sheet: Table S8
	Table S8: Incident fatty liver disease at SHIP-3 and its association to plasma metabolites at SHIP-2
	Associations of plasma metabolite profiles at SHIP-2 with the trait 'Incident fatty liver disease at SHIP-3'. Significantly associated plasma metabolites were then associated with those genera at SHIP-2 which were found to also associate with the trait 'Incident fatty liver disease at SHIP-3'. Included covariables in all linear regression models: Sequencing batch (for genus associations), age, se…
	Plasma metabolites	Association with incident fatty liver disease			Association with Clostridium XIVa			Association with Clostridium XIVb			Association with Collinsella			Association with Oscillibacter
		Estimate	p-value	q-value	Estimate	p-value	q-value	Estimate	p-value	q-value	Estimate	p-value	q-value	Estimate	p-value	q-value
	PC.aa.C40.5	0.228112	0.000181052	0.0160231	0.0735986	6.37289e-07	9.55934e-06	0.0518785	0.000916213	0.0137432	0.033171	0.0483891	0.167416	-0.0209896	0.152287	0.380719
	PC.ae.C36.2	-0.195245	0.000110853	0.0160231	-0.0214011	0.0874483	0.163966	-0.0121836	0.353615	0.589358	-0.0261573	0.0658469	0.167416	0.00244016	0.843077	0.972782
	Tyr	0.157642	0.00167205	0.0269048	0.018148	0.15175	0.252917	0.0316004	0.0155479	0.0777395	0.0282627	0.0395472	0.167416	-0.0204644	0.097743	0.293229
	PC.aa.C32.1	0.332673	0.000742838	0.0269048	0.0687514	0.00457449	0.0137235	0.0457505	0.0788873	0.169044	0.0546545	0.0476388	0.167416	-0.0516047	0.030657	0.153285
	PC.aa.C40.4	0.173451	0.00146678	0.0269048	0.0511456	0.000113359	0.000850194	0.0344221	0.0151064	0.0777395	0.0322483	0.0313806	0.167416	-0.0227263	0.0851544	0.293229
	PC.ae.C30.2	-0.176227	0.00119855	0.0269048	-0.00890769	0.505372	0.583122	0.000715156	0.959936	0.959936	-0.00601061	0.69043	0.739747	-0.000448383	0.973142	0.973142
	PC.ae.C34.2	-0.172019	0.00145347	0.0269048	-0.0268451	0.0469288	0.117322	-0.0209516	0.137219	0.257286	-0.0102861	0.504898	0.582574	0.00328627	0.802736	0.972782
	PC.ae.C42.5	-0.125309	0.00158965	0.0269048	-0.0125524	0.205893	0.30884	-0.00832149	0.416249	0.624373	-0.012472	0.263059	0.394589	0.00723387	0.458673	0.764455
	SM..OH..C14.1	-0.182932	0.00117859	0.0269048	-0.0101622	0.463378	0.579222	0.00365196	0.803721	0.917421	-0.0152219	0.330857	0.413572	0.00146643	0.915173	0.973142
	SM..OH..C16.1	-0.168702	0.00162969	0.0269048	-0.0147853	0.262814	0.358382	-0.00250534	0.856259	0.917421	-0.0260995	0.0781276	0.167416	0.0137016	0.296262	0.555492
	SM..OH..C22.2	-0.165002	0.000753224	0.0269048	0.00188045	0.876268	0.916248	0.00622699	0.623778	0.850606	-0.0204723	0.135544	0.254144	-0.00268012	0.822056	0.972782
	lysoPC.a.C17.0	-0.190168	0.00207489	0.0306046	0.00162331	0.916248	0.916248	-0.00296002	0.855031	0.917421	-0.023767	0.158182	0.263637	0.00588597	0.695442	0.972782
	lysoPC.a.C14.0	0.0741518	0.0032378	0.0426431	0.0201985	0.0014682	0.00550574	0.0137751	0.037285	0.0932126	-0.000590697	0.932422	0.932422	-0.0200249	0.00113246	0.0169868
	PC.ae.C44.6	-0.144574	0.0033729	0.0426431	-0.0225705	0.0662804	0.142029	-0.0287522	0.0246414	0.0924054	-0.0139221	0.313272	0.413572	0.0140695	0.240562	0.51549
	PC.aa.C34.4	0.228606	0.00367762	0.0433959	0.0677255	0.000461243	0.00230622	0.0436314	0.034948	0.0932126	0.0389942	0.0762245	0.167416	-0.0526533	0.00613824	0.0460368
	C8	0.0958012	0.00468121	0.0517858
	C5	0.136896	0.00617629	0.0643061
	PC.aa.C30.0	0.176838	0.0113208	0.0910809
	PC.aa.C36.5	0.253446	0.0101687	0.0910809
	PC.ae.C32.2	-0.11329	0.0109576	0.0910809
	PC.ae.C36.0	0.125157	0.0106459	0.0910809
	PC.ae.C44.5	-0.127214	0.00930442	0.0910809
	lysoPC.a.C16.1	0.166285	0.0120655	0.092852
	PC.ae.C40.6	-0.135822	0.012766	0.0941493
	lysoPC.a.C28.1	-0.138559	0.0134087	0.0949336
	PC.ae.C38.3	-0.113247	0.0156489	0.106533
	PC.aa.C38.3	0.115274	0.0189043	0.111536
	PC.aa.C38.5	0.130255	0.0188081	0.111536
	PC.ae.C42.4	-0.105175	0.0179451	0.111536
	PC.ae.C44.4	-0.0932216	0.0188337	0.111536
	PC.aa.C34.1	0.10899	0.0207482	0.114764
	SM.C16.1	-0.0975667	0.0201691	0.114764
	Ser	-0.110827	0.022083	0.118445
	C3	0.119777	0.0280046	0.133308
	PC.aa.C38.4	0.114149	0.0283583	0.133308
	PC.ae.C38.4	-0.100272	0.0278994	0.133308
	PC.ae.C40.3	-0.0907476	0.0286197	0.133308
	PC.ae.C40.4	-0.0928702	0.0266992	0.133308
	PC.aa.C36.1	0.120109	0.0305903	0.135719
	SM.C26.0	-0.118462	0.0306709	0.135719
	SM.C16.0	-0.0774388	0.0405899	0.17523
	Kynurenine	0.0976478	0.0492821	0.198266
	PC.aa.C34.3	0.127824	0.0492864	0.198266
	PC.aa.C36.6	0.160687	0.047222	0.198266
	lysoPC.a.C20.3	0.11404	0.0532568	0.209477
	Phe	0.0628657	0.0584524	0.224549
	PC.aa.C24.0	0.098586	0.059626	0.224549
	C10	0.0760416	0.0676491	0.234782
	C10.1	0.0537604	0.066863	0.234782
	lysoPC.a.C28.0	0.0899342	0.0660888	0.234782
	PC.aa.C40.6	0.127088	0.0660116	0.234782
	PC.aa.C36.4	0.0845265	0.0703473	0.239451
	Glu	0.158098	0.0736327	0.240112
	Leu	0.0956769	0.0751832	0.240112
	PC.aa.C32.2	0.127028	0.0759676	0.240112
	PC.aa.C36.3	0.0800979	0.075139	0.240112
	C7.DC	0.0727773	0.0784072	0.243475
	Ala	0.0825698	0.0913604	0.256679
	Ile	0.0945046	0.0885898	0.256679
	alpha.AAA	0.168587	0.0913193	0.256679
	lysoPC.a.C16.0	0.0779858	0.0876848	0.256679
	PC.ae.C36.1	-0.0859295	0.0854307	0.256679
	PC.ae.C36.3	-0.0876812	0.0866539	0.256679
	PC.ae.C34.1	-0.0777006	0.0948398	0.262291
	Gly	-0.0925007	0.099602	0.271224
	C3.DC...C4.OH	0.0705268	0.121961	0.317198
	Trp	0.0517335	0.123653	0.317198
	PC.aa.C30.2	-0.0733146	0.118342	0.317198
	PC.ae.C40.2	-0.0823387	0.122343	0.317198
	C14.1	0.102479	0.131626	0.324206
	PC.aa.C42.6	0.0752535	0.128349	0.324206
	PC.ae.C42.1	0.0622429	0.13188	0.324206
	Gln	-0.0455024	0.134527	0.326182
	SM.C22.3	0.0898942	0.138878	0.332182
	PC.ae.C34.3	-0.0831005	0.141047	0.332871
	Asn	-0.0678085	0.149137	0.343564
	PC.aa.C38.0	-0.0867564	0.14946	0.343564
	C4.1	0.0446031	0.15986	0.361478
	C3.DC.M...C5.OH	0.0336901	0.162696	0.361478
	C12.DC	-0.02455	0.16338	0.361478
	SM.C18.1	-0.0646558	0.168832	0.368928
	PC.ae.C40.1	0.0709195	0.177603	0.378744
	PC.ae.C44.3	0.059687	0.176083	0.378744
	lysoPC.a.C24.0	0.0601664	0.183569	0.38211
	PC.aa.C26.0	0.0497258	0.186545	0.38211
	PC.ae.C36.5	0.0717007	0.183633	0.38211
	PC.ae.C38.0	0.083927	0.187817	0.38211
	SM..OH..C22.1	-0.0649129	0.192265	0.386714
	C5.1.DC	0.0328992	0.19806	0.389518
	C16	0.0496397	0.197607	0.389518
	PC.aa.C32.0	0.0553969	0.207849	0.404277
	C18.1.OH	-0.0434151	0.210717	0.405402
	PC.aa.C42.0	-0.0567792	0.213384	0.406117
	PC.ae.C32.1	-0.0567369	0.218365	0.411177
	C16.1.OH	0.0630395	0.225679	0.420475
	C5.1	0.0281716	0.231362	0.424524
	C9	0.0420683	0.232649	0.424524
	PC.ae.C42.0	-0.0349379	0.241266	0.435756
	PC.aa.C42.1	-0.0486821	0.249279	0.445681
	PC.aa.C40.2	-0.0702113	0.25318	0.448128
	Lys	0.0392994	0.279246	0.479869
	lysoPC.a.C26.0	0.0583623	0.278206	0.479869
	PC.ae.C40.5	-0.0470002	0.275709	0.479869
	C2	0.073937	0.287471	0.484595
	C3.OH	0.0307327	0.286851	0.484595
	PC.aa.C32.3	-0.0491373	0.292703	0.488759
	PC.aa.C42.5	0.0561306	0.308945	0.511058
	C0	0.0440078	0.330539	0.511297
	C3.1	0.03063	0.332198	0.511297
	lysoPC.a.C18.0	0.0566521	0.326721	0.511297
	lysoPC.a.C18.1	0.0624653	0.314867	0.511297
	PC.aa.C36.0	0.0630076	0.329365	0.511297
	PC.aa.C36.2	0.0413843	0.327569	0.511297
	PC.aa.C38.6	0.0646154	0.329394	0.511297
	PC.ae.C38.2	-0.0486012	0.317354	0.511297
	Pro	0.0562374	0.340562	0.519651
	SM.C18.0	0.0390308	0.39112	0.591694
	lysoPC.a.C20.4	0.046593	0.419278	0.626921
	SM.C26.1	0.0520353	0.421489	0.626921
	C14.2	0.0308107	0.440291	0.644062
	SM.C20.2	0.0462199	0.440176	0.644062
	Creatinine	-0.032122	0.452367	0.650966
	Taurine	-0.0447928	0.449893	0.650966
	PC.aa.C42.2	0.0339344	0.47851	0.683034
	C4	0.0383824	0.520403	0.690228
	Met	0.0352738	0.489769	0.690228
	Val	0.0223692	0.492577	0.690228
	Ac.Orn	-0.0964789	0.519238	0.690228
	Histamine	-0.00152671	0.498881	0.690228
	Spermine	-0.00675313	0.501056	0.690228
	PC.ae.C30.0	-0.038778	0.520011	0.690228
	SM.C24.0	0.0311961	0.522545	0.690228
	SM.C24.1	-0.0331247	0.503623	0.690228
	H1	0.0224499	0.521461	0.690228
	C14	0.0236911	0.56015	0.733849
	Thr	-0.0300643	0.563861	0.733849
	Cit	-0.0367334	0.571727	0.738654
	PC.aa.C34.2	0.020137	0.577793	0.741082
	Serotonin	-0.144417	0.594607	0.75572
	PC.aa.C28.1	-0.0273843	0.597744	0.75572
	PC.ae.C42.3	-0.0227423	0.612447	0.768816
	Asp	0.0438336	0.619231	0.771859
	His	-0.0142944	0.625538	0.774267
	PC.ae.C42.2	0.0223484	0.646697	0.794898
	C5.M.DC	-0.0120601	0.651368	0.795118
	C12.1	0.0134498	0.660713	0.795463
	lysoPC.a.C18.2	-0.0302388	0.658507	0.795463
	PC.ae.C34.0	-0.02707	0.665133	0.795463
	PC.ae.C38.5	-0.0174011	0.706327	0.83906
	C14.1.OH	0.0130277	0.735572	0.856555
	ADMA	0.0133045	0.732783	0.856555
	Spermidine	-0.0147684	0.735218	0.856555
	Arg	0.0172791	0.751592	0.869489
	Orn	-0.0166144	0.757738	0.870907
	SM..OH..C24.1	-0.0138331	0.773864	0.883703
	PC.ae.C38.6	-0.0152771	0.783666	0.889159
	C10.2	-0.00686743	0.790971	0.891731
	C16.1	-0.006825	0.834932	0.923272
	C18	-0.00923155	0.828957	0.923272
	Putrescine	-0.0204442	0.839873	0.923272
	t4.OH.Pro	-0.0179016	0.850245	0.923272
	total.DMA	-0.00813318	0.84387	0.923272
	PC.ae.C36.4	-0.0106969	0.846151	0.923272
	C18.2	0.00798638	0.859107	0.927207
	SDMA	-0.0165041	0.866267	0.929269
	lysoPC.a.C26.1	-0.00745216	0.887551	0.94357
	PC.aa.C38.1	0.0165787	0.895592	0.94357
	PC.aa.C40.3	0.00718915	0.892364	0.94357
	C16.2	-0.00496023	0.921406	0.963189
	Met.SO	-0.00801522	0.925096	0.963189
	C5.DC...C6.OH	-0.00232632	0.945353	0.975688
	C12	-0.00217007	0.948126	0.975688
	PC.aa.C40.1	-0.00195908	0.959512	0.981697
	C16.OH	-0.00134073	0.969692	0.986411
	C18.1	0.00105333	0.980124	0.991325
	C14.2.OH	-0.000697277	0.986335	0.991939
	PC.aa.C42.4	-0.000127987	0.997551	0.997551

## Sheet: Table S9
	Table S9: Association of Clostridium XIVa with gut microbial pathways
	Associations between Clostridium XIVa at SHIP-2 with predicted metagenomic microbial pathways for fatty acid biosynthesis. Included covariables in all linear regression models: Sequencing batch, age, sex, body mass index (BMI), and diet (Food Frequency Score).
		Estimate	p-value	q-value
	superpathway of fatty acid biosynthesis initiation (E. coli)	0.233837	4.12645e-15	2.51064e-14
	oleate biosynthesis IV (anaerobic)	0.231692	6.35843e-15	2.51064e-14
	stearate biosynthesis II (bacteria and plants)	0.231862	9.4149e-15	2.51064e-14
	palmitoleate biosynthesis I (from (5Z)-dodec-5-enoate)	0.230045	1.31276e-14	2.62552e-14
	(5Z)-dodec-5-enoate biosynthesis	0.228836	1.80922e-14	2.89475e-14
	fatty acid elongation -- saturated	0.116054	0.000101464	0.000135285
	fatty acid salvage	0.129646	0.00363424	0.00415342
	palmitate biosynthesis II (bacteria and plants)	-0.00376313	0.900312	0.900312

## Sheet: Table S10
	Table S10: Incident diabetes mellitus at SHIP-3 and its association to fecal microbial genera at SHIP-3 and SHIP-2
	Associations between incident diabetes mellitus at SHIP-3 with fecal microbiota in the affected individuals at SHIP-3 (incident disease) and SHIP-2 (before disease became apparent). Only genera with presence in at least 50 individuals with incident diabetes mellitus and a mean abundance of at least 0.1% were included into the model. Included covariables in all linear regression models: Sequencing…
		Genus associations at SHIP-3			Genus associations at SHIP-2
		Estimate	p-value	q-value	Estimate	p-value	q-value
	Bacteroides	0.0523367	0.774472	0.828526
	Alistipes	-0.0405016	0.827944	0.828526
	unclassified Lachnospiraceae (family)	0.169063	0.349717	0.68648
	unclassified Ruminococcaceae (family)	-0.326227	0.0678546	0.311618
	Faecalibacterium	0.328857	0.0719118	0.311618
	unclassified Firmicutes (phylum)	0.093939	0.601726	0.782244
	Roseburia	0.286548	0.112654	0.366126
	Clostridium IV	-0.218404	0.237044	0.616315
	Oscillibacter	-0.161077	0.369643	0.68648
	Ruminococcus2	0.0406237	0.828526	0.828526
	Flavonifractor	0.112711	0.546628	0.782244
	Clostridium XlVa	0.580046	0.00126274	0.0164156	0.314388	0.039189	0.039189
	Butyricicoccus	0.119538	0.526818	0.782244

[truncated: 1 more sheets: Table S11]
